# Supplementary material
Source: Research Square preprint supplement (doi:10.21203/rs.3.rs-9570403/v2)
Supplement: Supplementary file 1 [file ab292ad8c83e0adb511a63e4.docx]

**Supplementary Table S1.** Harmonised functional trait values (SLA, wood density, leaf area, seed mass) for representative forest taxa in West Africa, compiled from the TRY Plant Trait Database and aligned to pollen taxa used in this study.

| Taxon | SLA | WoodDensity | LeafArea_leaf | LeafArea_leaflet | SeedMass |
| --- | --- | --- | --- | --- | --- |
| Acrostichum | 8.175134 | 0.531471 | 7313.083 | 3678.329 | 201.76 |
| Acrostichum aureum | 8.175134 | 0.531471 | 7313.083 | 3678.329 | 201.76 |
| Alstonia | 14.11484 | 0.374075 | 7313.083 | 3678.329 | 201.76 |
| Alstonia congensis | 14.11484 | 0.374075 | 7313.083 | 3678.329 | 201.76 |
| Ambrosia maritima-type | 26.19503 | 0.291667 | 1002.515 | 675 | 32.55845 |
| Antidesma | 21.60827 | 0.582308 | 3035.1 | 3035.1 | 34.79446 |
| Antidesma venosum | 21.60827 | 0.582308 | 3035.1 | 3035.1 | 34.79446 |
| Asystasia gangetica-type | 20.718 | 0.531471 | 7313.083 | 3678.329 | 7.3244 |
| Balanites | 14.11484 | 0.531471 | 7313.083 | 2907.348 | 201.76 |
| Balanites wilsoniana | 14.11484 | 0.531471 | 7313.083 | 2907.348 | 201.76 |
| Carapa procera | 10.53084 | 0.582847 | 7313.083 | 9385.715 | 20495.32 |
| Ceiba | 15.42619 | 0.319548 | 13661.4 | 4381.561 | 56.52767 |
| Ceiba pentandra | 15.42619 | 0.319548 | 13661.4 | 4381.561 | 56.52767 |
| Centaurea perrottetii-type | 14.11484 | 0.531471 | 7313.083 | 3678.329 | 9.4196 |
| Chaetachme | 13.10157 | 0.549264 | 1152.435 | 1121.461 | 1088.56 |
| Chaetachme aristata | 13.10157 | 0.549264 | 1152.435 | 1121.461 | 1088.56 |
| Clappertonia ficifolia | 14.11484 | 0.531471 | 7313.083 | 3678.329 | 1.612933 |
| Clausena anisata | 11.15 | 0.569554 | 7313.083 | 670 | 78.78228 |
| Cocos nucifera | 14.11484 | 0.5 | 7313.083 | 3678.329 | 576800 |
| Drymaria cordata-type | 14.11484 | 0.265872 | 252 | 252 | 0.65168 |
| Elaeis guineensis | 14.11484 | 0.241135 | 7313.083 | 3678.329 | 2210.95 |
| Gardenia | 14.11484 | 0.531471 | 7313.083 | 3678.329 | 3.5187 |
| Glyphaea brevis | 14.11484 | 0.531471 | 4590.415 | 4590.415 | 17.02178 |
| Gymnosporia senegalensis | 6.806602 | 0.616327 | 690.3034 | 1071.877 | 7.443257 |
| Harungana madagascariensis-type | 10.83424 | 0.469359 | 7313.083 | 7313.083 | 31.11169 |
| Hildegardia barteri | 14.11484 | 0.531471 | 7313.083 | 3678.329 | 313.68 |
| Holoptelea grandis | 14.11484 | 0.594068 | 7313.083 | 3678.329 | 201.76 |
| Ilex mitis | 12.83605 | 0.531471 | 1333.67 | 1219.113 | 2.393657 |
| Klaineanthus gaboniae | 14.11484 | 0.531471 | 8429.616 | 8429.616 | 201.76 |
| Laguncularia racemosa | 7.656968 | 0.61 | 7313.083 | 3678.329 | 280 |
| Leea | 14.11484 | 0.531471 | 7313.083 | 3678.329 | 34.54253 |
| Leea guineensis | 14.11484 | 0.531471 | 7313.083 | 3678.329 | 34.54253 |
| Lepisanthes senegalensis | 16.33987 | 0.63 | 7313.083 | 7939.817 | 633.44 |
| Machaerium lunatum | 14.11484 | 0.24 | 7313.083 | 3678.329 | 201.76 |
| Machaerium lunatum-type | 14.11484 | 0.24 | 7313.083 | 3678.329 | 201.76 |
| Margaritaria discoidea | 14.11484 | 0.701477 | 4812.214 | 4812.214 | 13.4192 |
| Mimosa | 14.11484 | 0.729 | 7313.083 | 5.3328 | 17.17784 |
| Mimosa pigra | 14.11484 | 0.729 | 7313.083 | 5.3328 | 17.17784 |
| Mitracarpus | 14.11484 | 0.531471 | 7313.083 | 3678.329 | 0.13727 |
| Mitracarpus hirtus | 14.11484 | 0.531471 | 7313.083 | 3678.329 | 0.13727 |
| Monodora | 14.11484 | 0.49 | 7313.083 | 3678.329 | 806.04 |
| Monodora tenuifolia | 14.11484 | 0.49 | 7313.083 | 3678.329 | 806.04 |
| Nesogordonia papaverifera | 5.427163 | 0.675862 | 3602.263 | 3602.263 | 201.76 |
| Paullinia | 18.42982 | 0.531471 | 74530.2 | 3754.396 | 216.8575 |
| Paullinia pinnata | 18.42982 | 0.531471 | 74530.2 | 3754.396 | 216.8575 |
| Pentaclethra | 14.11484 | 0.83227 | 7313.083 | 159.6248 | 6235.701 |
| Pentaclethra macrophylla | 14.11484 | 0.83227 | 7313.083 | 159.6248 | 6235.701 |
| Pentadesma | 14.11484 | 0.531471 | 24270.96 | 24270.96 | 201.76 |
| Pentadesma butyracea | 14.11484 | 0.531471 | 24270.96 | 24270.96 | 201.76 |
| Pentadesma grandifolia | 14.11484 | 0.531471 | 24270.96 | 24270.96 | 201.76 |
| Persicaria attenuata subsp. africana-type | 14.11484 | 0.531471 | 7313.083 | 3678.329 | 4.339822 |
| Persicaria senegalensis-type | 14.11484 | 0.531471 | 7313.083 | 3678.329 | 4.339822 |
| Phoenix | 14.11484 | 0.531471 | 7313.083 | 3678.329 | 391.9694 |
| Phoenix reclinata | 14.11484 | 0.531471 | 7313.083 | 3678.329 | 391.9694 |
| Phoenix reclinata-type | 14.11484 | 0.531471 | 7313.083 | 3678.329 | 391.9694 |
| Piptadeniastrum africanum | 14.11484 | 0.626879 | 7313.083 | 3678.329 | 206.64 |
| Pterocarpus santalinoides | 14.11484 | 0.528 | 7313.083 | 3678.329 | 1922.68 |
| Pycnanthus | 15.8067 | 0.428909 | 13724.56 | 13724.56 | 1890.236 |
| Pycnanthus angolensis | 15.8067 | 0.428909 | 13724.56 | 13724.56 | 1890.236 |
| Pycnanthus angolensis-type | 15.8067 | 0.428909 | 13724.56 | 13724.56 | 1890.236 |
| Schrebera arborea-type | 14.11484 | 0.662855 | 7313.083 | 3678.329 | 201.76 |
| Symphonia | 15.12811 | 0.594097 | 1914.475 | 1914.475 | 2157.275 |
| Symphonia globulifera | 15.12811 | 0.594097 | 1914.475 | 1914.475 | 2157.275 |
| Tetracera | 14.11484 | 0.531471 | 8400 | 8400 | 11.594 |
| Tetracera alnifolia-type | 14.11484 | 0.531471 | 8400 | 8400 | 11.594 |
| Treculia africana-type | 14.11484 | 0.531471 | 7313.083 | 3678.329 | 196.88 |
| Triplochiton | 6.126018 | 0.34976 | 7313.083 | 3678.329 | 301.2 |
| Triplochiton scleroxylon | 6.126018 | 0.34976 | 7313.083 | 3678.329 | 301.2 |
| Triplochiton scleroxylon-type | 6.126018 | 0.34976 | 7313.083 | 3678.329 | 301.2 |

**Supplementary Table S2.** Harmonised functional trait values (SLA, wood density, leaf area, seed mass) for representative savanna taxa in West Africa, compiled from the TRY Plant Trait Database and aligned to pollen taxa used in this study.

| Taxon | SLA | WoodDensity | LeafArea_leaf | LeafArea_leaflet | SeedMass |
| --- | --- | --- | --- | --- | --- |
| Ambrosia | 26.19503 | 0.291667 | 1002.515 | 675 | 32.55845 |
| Anthostema | 15.42619 | 0.555154 | 5622.652 | 3843.308 | 127.0118 |
| Anthostema senegalense | 15.42619 | 0.555154 | 5622.652 | 3843.308 | 127.0118 |
| Antidesma | 21.60827 | 0.582308 | 3035.1 | 3035.1 | 34.79446 |
| Antidesma venosum | 21.60827 | 0.582308 | 3035.1 | 3035.1 | 34.79446 |
| Argania spinosa | 15.42619 | 0.555154 | 5622.652 | 3843.308 | 3940 |
| Balanites | 15.42619 | 0.555154 | 5622.652 | 2907.348 | 45.66107 |
| Burkea | 8.3625 | 0.61246 | 5622.652 | 633.9558 | 94.4295 |
| Burkea africana | 8.3625 | 0.61246 | 5622.652 | 633.9558 | 94.4295 |
| Casuarina equisetifolia | 3.020463 | 0.806254 | 5622.652 | 3843.308 | 4.384014 |
| Ceiba | 15.42619 | 0.319548 | 13661.4 | 4381.561 | 56.52767 |
| Ceiba pentandra | 15.42619 | 0.319548 | 13661.4 | 4381.561 | 56.52767 |
| Celosia | 15.42619 | 0.555154 | 5622.652 | 3843.308 | 0.175138 |
| Celosia trigyna | 15.42619 | 0.555154 | 5622.652 | 3843.308 | 0.175138 |
| Centaurea | 15.42619 | 0.555154 | 5622.652 | 3843.308 | 9.4196 |
| Centaurea perrottetii | 15.42619 | 0.555154 | 5622.652 | 3843.308 | 9.4196 |
| Crossopteryx | 1.96 | 0.701715 | 3932.22 | 3932.22 | 2.80424 |
| Crossopteryx febrifuga | 1.96 | 0.701715 | 3932.22 | 3932.22 | 2.80424 |
| Elaeis guineensis | 15.42619 | 0.241135 | 5622.652 | 3843.308 | 2210.95 |
| Ephedra | 2.213 | 0.555154 | 35.7 | 3843.308 | 15.13111 |
| Gardenia imperialis | 15.42619 | 0.555154 | 5622.652 | 3843.308 | 3.5187 |
| Gymnosporia senegalensis | 6.806602 | 0.616327 | 690.3034 | 1071.877 | 7.443257 |
| Harungana | 10.83424 | 0.469359 | 7313.083 | 7313.083 | 31.11169 |
| Holoptelea grandis | 15.42619 | 0.594068 | 5622.652 | 3843.308 | 40.22777 |
| Lepisanthes | 16.33987 | 0.63 | 5622.652 | 7939.817 | 633.44 |
| Lepisanthes senegalensis | 16.33987 | 0.63 | 5622.652 | 7939.817 | 633.44 |
| Mimosa pigra | 15.42619 | 0.729 | 5622.652 | 5.3328 | 17.17784 |
| Mitracarpus | 15.42619 | 0.555154 | 5622.652 | 3843.308 | 0.13727 |
| Mitracarpus hirtus | 15.42619 | 0.555154 | 5622.652 | 3843.308 | 0.13727 |
| Nesogordonia | 5.427163 | 0.675862 | 3602.263 | 3602.263 | 45.66107 |
| Panda oleosa | 15.42619 | 0.585644 | 12025.4 | 12025.4 | 40.22777 |
| Paullinia | 18.42982 | 0.555154 | 74530.2 | 3754.396 | 216.8575 |
| Paullinia pinnata | 18.42982 | 0.555154 | 74530.2 | 3754.396 | 216.8575 |
| Persicaria senegalensis | 15.42619 | 0.555154 | 5622.652 | 3843.308 | 4.339822 |
| Phoenix | 15.42619 | 0.555154 | 5622.652 | 3843.308 | 391.9694 |
| Phoenix reclinata | 15.42619 | 0.555154 | 5622.652 | 3843.308 | 391.9694 |
| Polydora serratuloides | 15.42619 | 0.555154 | 5622.652 | 3843.308 | 1.7594 |
| Pseudospondias microcarpa | 15.42619 | 0.555154 | 5622.652 | 8449.782 | 729.24 |
| Pterocarpus | 15.42619 | 0.528 | 5622.652 | 3843.308 | 1922.68 |
| Pycnanthus | 15.8067 | 0.428909 | 13724.56 | 13724.56 | 1890.236 |
| Tacazzea apiculata | 15.42619 | 0.555154 | 5622.652 | 3843.308 | 8.763067 |
| Tetracera | 15.42619 | 0.555154 | 8400 | 8400 | 11.594 |
| Tetracera alnifolia | 15.42619 | 0.555154 | 8400 | 8400 | 11.594 |
| Treculia | 15.42619 | 0.555154 | 5622.652 | 3843.308 | 196.88 |
| Treculia africana | 15.42619 | 0.555154 | 5622.652 | 3843.308 | 196.88 |
| Triplochiton scleroxylon | 6.126018 | 0.34976 | 5622.652 | 3843.308 | 301.2 |

**Supplementary Table S3.** Functional dispersion (FDis, Gower distance) values for forest and savanna pollen samples across multiple West African sites, spanning the Holocene. Each entry includes biome, calibrated age (years BP), site name, and sample identifier.

| Biome | Age | SampleKey | FDis_Gower | Site | Sample.id |
| --- | --- | --- | --- | --- | --- |
| Forest | 563 | Forest_1 | 0.093874 | Eastern Niger Delta | 50 |
| Forest | 602.9 | Forest_2 | 0.116925 | Eastern Niger Delta | 190 |
| Forest | 620 | Forest_3 | 0.094556 | Eastern Niger Delta | 250 |
| Forest | 2036.36 | Forest_4 | 0.099188 | Eastern Niger Delta | 450 |
| Forest | 3027.813 | Forest_5 | 0.063172 | Eastern Niger Delta | 590 |
| Forest | 3523.539 | Forest_6 | 0.102611 | Eastern Niger Delta | 660 |
| Forest | 4514.991 | Forest_7 | 0.05698 | Eastern Niger Delta | 800 |
| Forest | 5789.715 | Forest_8 | 0 | Eastern Niger Delta | 980 |
| Forest | 6115.478 | Forest_9 | 0 | Eastern Niger Delta | 1026 |
| Forest | 8055.892 | Forest_11 | 0 | Eastern Niger Delta | 1300 |
| Forest | 1266.734 | Forest_12 | 0.089939 | GOHO | 110 |
| Forest | 1646.038 | Forest_13 | 0.165528 | GOHO | 120 |
| Forest | 2025.342 | Forest_14 | 0.07343 | GOHO | 130 |
| Forest | 2404.646 | Forest_15 | 0.040716 | GOHO | 140 |
| Forest | 2783.949 | Forest_16 | 0.060388 | GOHO | 150 |
| Forest | 3163.253 | Forest_17 | 0.067918 | GOHO | 160 |
| Forest | 3542.557 | Forest_18 | 0.067394 | GOHO | 170 |
| Forest | 3921.861 | Forest_19 | 0.064692 | GOHO | 180 |
| Forest | 4490.816 | Forest_20 | 0 | GOHO | 195 |
| Forest | 4680.468 | Forest_21 | 0.06065 | GOHO | 200 |
| Forest | 5059.772 | Forest_22 | 0.063912 | GOHO | 210 |
| Forest | 5439.076 | Forest_23 | 0.026604 | GOHO | 220 |
| Forest | 5818.38 | Forest_24 | 0.07519 | GOHO | 230 |
| Forest | 6197.684 | Forest_25 | 0.041382 | GOHO | 240 |
| Forest | 6576.987 | Forest_26 | 0.104389 | GOHO | 250 |
| Forest | 6847.051 | Forest_27 | 0.068651 | GOHO | 260 |
| Forest | 6862.221 | Forest_28 | 0 | GOHO | 270 |
| Forest | 6888.01 | Forest_29 | 0.061625 | GOHO | 287 |
| Forest | 6895.594 | Forest_30 | 0.039976 | GOHO | 292 |
| Forest | 6910.764 | Forest_31 | 0.078526 | GOHO | 302 |
| Forest | 6925.934 | Forest_32 | 0.092489 | GOHO | 312 |
| Forest | 6941.104 | Forest_33 | 0.072866 | GOHO | 322 |
| Forest | 6956.274 | Forest_34 | 0.106308 | GOHO | 332 |
| Forest | 6971.444 | Forest_35 | 0.067724 | GOHO | 342 |
| Forest | 6986.614 | Forest_36 | 0.040563 | GOHO | 352 |
| Forest | 7001.783 | Forest_37 | 0.058091 | GOHO | 362 |
| Forest | 7016.953 | Forest_38 | 0.085775 | GOHO | 372 |
| Forest | 7029.089 | Forest_39 | 0.056048 | GOHO | 380 |
| Forest | 7044.259 | Forest_40 | 0.066623 | GOHO | 390 |
| Forest | 7059.429 | Forest_41 | 0.071098 | GOHO | 400 |
| Forest | 7074.599 | Forest_42 | 0.07315 | GOHO | 410 |
| Forest | 7089.769 | Forest_43 | 0.020986 | GOHO | 420 |
| Forest | 7104.938 | Forest_44 | 0.082205 | GOHO | 430 |
| Forest | 7120.108 | Forest_45 | 0.058269 | GOHO | 440 |
| Forest | 7135.278 | Forest_46 | 0.083505 | GOHO | 450 |
| Forest | 7150.448 | Forest_47 | 0.06823 | GOHO | 460 |
| Forest | 7165.618 | Forest_48 | 0.036998 | GOHO | 470 |
| Forest | 7180.788 | Forest_49 | 0.068887 | GOHO | 480 |
| Forest | 7195.958 | Forest_50 | 0.081485 | GOHO | 490 |
| Forest | 7211.127 | Forest_51 | 0.106553 | GOHO | 500 |
| Forest | 7226.297 | Forest_52 | 0.072219 | GOHO | 510 |
| Forest | 7241.467 | Forest_53 | 0.053047 | GOHO | 520 |
| Forest | 7256.637 | Forest_54 | 0.075698 | GOHO | 530 |
| Forest | 7271.807 | Forest_55 | 0.071785 | GOHO | 540 |
| Forest | 7286.977 | Forest_56 | 0.032051 | GOHO | 550 |
| Forest | 7302.146 | Forest_57 | 0.090941 | GOHO | 560 |
| Forest | 7317.316 | Forest_58 | 0.043781 | GOHO | 570 |
| Forest | 7332.486 | Forest_59 | 0.068683 | GOHO | 580 |
| Forest | 7347.656 | Forest_60 | 0.106338 | GOHO | 590 |
| Forest | 7362.826 | Forest_61 | 0.09508 | GOHO | 600 |
| Forest | 7377.996 | Forest_62 | 0.083338 | GOHO | 610 |
| Forest | 7393.166 | Forest_63 | 0.098048 | GOHO | 620 |
| Forest | 7408.335 | Forest_64 | 0.08856 | GOHO | 630 |
| Forest | 7415.92 | Forest_65 | 0.058137 | GOHO | 635 |
| Forest | 7431.09 | Forest_66 | 0.109233 | GOHO | 645 |
| Forest | 7438.675 | Forest_67 | 0.080554 | GOHO | 650 |
| Forest | 7453.845 | Forest_68 | 0.091004 | GOHO | 660 |
| Forest | 7469.015 | Forest_69 | 0.09182 | GOHO | 670 |
| Forest | 7484.185 | Forest_70 | 0.097126 | GOHO | 680 |
| Forest | 7499.354 | Forest_71 | 0.14642 | GOHO | 690 |
| Forest | 7514.524 | Forest_72 | 0.102185 | GOHO | 700 |
| Forest | 7529.694 | Forest_73 | 0.046821 | GOHO | 710 |
| Forest | 7544.864 | Forest_74 | 0.058929 | GOHO | 720 |
| Forest | 7560.034 | Forest_75 | 0.093955 | GOHO | 730 |
| Forest | 274.2913 | Forest_76 | 0.072384 | KW31 | 22 |
| Forest | 646.5437 | Forest_77 | 1.53E-04 | KW31 | 41 |
| Forest | 1023.95 | Forest_78 | 0.040206 | KW31 | 61 |
| Forest | 1332.917 | Forest_79 | 0.061616 | KW31 | 92 |
| Forest | 1542.217 | Forest_80 | 0.088074 | KW31 | 113 |
| Forest | 1824.321 | Forest_81 | 0.115004 | KW31 | 145 |
| Forest | 2011.813 | Forest_82 | 0.076433 | KW31 | 167 |
| Forest | 2224.873 | Forest_83 | 0.036947 | KW31 | 192 |
| Forest | 2395.321 | Forest_84 | 0.063519 | KW31 | 212 |
| Forest | 2650.992 | Forest_85 | 0.054383 | KW31 | 242 |
| Forest | 2821.44 | Forest_86 | 0.061599 | KW31 | 262 |
| Forest | 3085.634 | Forest_87 | 0.04809 | KW31 | 293 |
| Forest | 3273.127 | Forest_88 | 0.065099 | KW31 | 315 |
| Forest | 3362.234 | Forest_89 | 0.056518 | KW31 | 347 |
| Forest | 3402.078 | Forest_90 | 0.068178 | KW31 | 372 |
| Forest | 3433.953 | Forest_91 | 0.056814 | KW31 | 392 |
| Forest | 3467.422 | Forest_92 | 0.047436 | KW31 | 413 |
| Forest | 4762.777 | Forest_93 | 0.033208 | KW31 | 443 |
| Forest | 4820.166 | Forest_94 | 0.01151 | KW31 | 462 |
| Forest | 4910.781 | Forest_95 | 0.018333 | KW31 | 492 |
| Forest | 5004.416 | Forest_96 | 0.051315 | KW31 | 523 |
| Forest | 5092.01 | Forest_97 | 0.026891 | KW31 | 552 |
| Forest | 5152.42 | Forest_98 | 0.062287 | KW31 | 572 |
| Forest | 5212.83 | Forest_99 | 0.076477 | KW31 | 592 |
| Forest | 5303.445 | Forest_100 | 0.030485 | KW31 | 622 |
| Forest | 5394.06 | Forest_101 | 0.066419 | KW31 | 652 |
| Forest | 5457.49 | Forest_102 | 0.037363 | KW31 | 673 |
| Forest | 5542.751 | Forest_103 | 0.047764 | KW31 | 694 |
| Forest | 5657.143 | Forest_104 | 0.061629 | KW31 | 722 |
| Forest | 5779.706 | Forest_105 | 0.081595 | KW31 | 752 |
| Forest | 5861.415 | Forest_106 | 0.028926 | KW31 | 772 |
| Forest | 5983.978 | Forest_107 | 0.081846 | KW31 | 802 |
| Forest | 6065.686 | Forest_108 | 0.012874 | KW31 | 822 |
| Forest | 6188.249 | Forest_109 | 0.036278 | KW31 | 852 |
| Forest | 6269.958 | Forest_110 | 0.065129 | KW31 | 872 |
| Forest | 6376.178 | Forest_111 | 0.052517 | KW31 | 898 |
| Forest | 6474.229 | Forest_112 | 0.070109 | KW31 | 922 |
| Forest | 6596.792 | Forest_113 | 0.073458 | KW31 | 952 |
| Forest | 6678.5 | Forest_114 | 0.045899 | KW31 | 972 |
| Forest | 6801.063 | Forest_115 | 0.052196 | KW31 | 1002 |
| Forest | 6882.771 | Forest_116 | 0.061086 | KW31 | 1022 |
| Forest | 7029.847 | Forest_117 | 0.026666 | KW31 | 1058 |
| Forest | 7091.039 | Forest_118 | 0.082531 | KW31 | 1073 |
| Forest | 7203.766 | Forest_119 | 0.062434 | KW31 | 1101 |
| Forest | 7316.494 | Forest_120 | 0.102833 | KW31 | 1129 |
| Forest | 7425.195 | Forest_121 | 0.060903 | KW31 | 1156 |
| Forest | 7529.87 | Forest_122 | 0.054641 | KW31 | 1182 |
| Forest | 7602.338 | Forest_123 | 0.071981 | KW31 | 1200 |
| Forest | 7711.039 | Forest_124 | 0.037949 | KW31 | 1227 |
| Forest | 7823.766 | Forest_125 | 0.062237 | KW31 | 1255 |
| Forest | 7892.208 | Forest_126 | 0.068048 | KW31 | 1272 |
| Forest | 8000.909 | Forest_127 | 0.123885 | KW31 | 1299 |
| Forest | 8109.61 | Forest_128 | 0.072064 | KW31 | 1326 |
| Forest | 8222.338 | Forest_129 | 0.097069 | KW31 | 1354 |
| Forest | 8290.779 | Forest_130 | 0.08115 | KW31 | 1371 |
| Forest | 8367.272 | Forest_131 | 0 | KW31 | 1390 |
| Forest | 2734.252 | Forest_132 | 0.093819 | Lake NokouÃ© | 142 |
| Forest | 3137.796 | Forest_133 | 0.074479 | Lake NokouÃ© | 152 |
| Forest | 3541.34 | Forest_134 | 0.07637 | Lake NokouÃ© | 162 |
| Forest | 3743.112 | Forest_135 | 0.07169 | Lake NokouÃ© | 167 |
| Forest | 4065.947 | Forest_136 | 0.071403 | Lake NokouÃ© | 175 |
| Forest | 4469.49 | Forest_137 | 0.030256 | Lake NokouÃ© | 185 |
| Forest | 4873.034 | Forest_138 | 0.008721 | Lake NokouÃ© | 195 |
| Forest | 5276.578 | Forest_139 | 0.013905 | Lake NokouÃ© | 205 |
| Forest | 5680.122 | Forest_140 | 0.007 | Lake NokouÃ© | 215 |
| Forest | 6083.665 | Forest_141 | 0.004645 | Lake NokouÃ© | 225 |
| Forest | 6418.829 | Forest_142 | 0.009417 | Lake NokouÃ© | 235 |
| Forest | 6480.472 | Forest_143 | 0.005064 | Lake NokouÃ© | 245 |
| Forest | 6542.115 | Forest_144 | 0.008426 | Lake NokouÃ© | 255 |
| Forest | 6603.758 | Forest_145 | 0.003057 | Lake NokouÃ© | 265 |
| Forest | 6646.908 | Forest_146 | 0.005878 | Lake NokouÃ© | 272 |
| Forest | 6708.551 | Forest_147 | 0.074379 | Lake NokouÃ© | 282 |
| Forest | 6770.194 | Forest_148 | 0.037727 | Lake NokouÃ© | 292 |
| Forest | 6831.837 | Forest_149 | 0.028351 | Lake NokouÃ© | 302 |
| Forest | 6893.48 | Forest_150 | 0.04097 | Lake NokouÃ© | 312 |
| Forest | 6955.124 | Forest_151 | 0.020938 | Lake NokouÃ© | 322 |
| Forest | 7016.767 | Forest_152 | 0.041536 | Lake NokouÃ© | 332 |
| Forest | 7078.41 | Forest_153 | 0.020973 | Lake NokouÃ© | 342 |
| Forest | 7140.053 | Forest_154 | 0.01525 | Lake NokouÃ© | 352 |
| Forest | 7189.368 | Forest_155 | 0.032068 | Lake NokouÃ© | 360 |
| Forest | 7251.011 | Forest_156 | 0.052586 | Lake NokouÃ© | 370 |
| Forest | 7312.654 | Forest_157 | 0 | Lake NokouÃ© | 380 |
| Forest | 7374.297 | Forest_158 | 0 | Lake NokouÃ© | 390 |
| Forest | 7435.94 | Forest_159 | 0 | Lake NokouÃ© | 400 |
| Forest | 7497.583 | Forest_160 | 0.038189 | Lake NokouÃ© | 410 |
| Forest | 7559.226 | Forest_161 | 0.028629 | Lake NokouÃ© | 420 |
| Forest | 7620.869 | Forest_162 | 0.062554 | Lake NokouÃ© | 430 |
| Forest | 7682.512 | Forest_163 | 0 | Lake NokouÃ© | 440 |
| Forest | 7744.155 | Forest_164 | 0.079069 | Lake NokouÃ© | 450 |
| Forest | 7805.799 | Forest_165 | 0.019863 | Lake NokouÃ© | 460 |
| Forest | 7867.442 | Forest_166 | 0 | Lake NokouÃ© | 470 |
| Forest | 7929.085 | Forest_167 | 0 | Lake NokouÃ© | 480 |
| Forest | 7990.728 | Forest_168 | 0.005572 | Lake NokouÃ© | 490 |
| Forest | 8052.371 | Forest_169 | 0 | Lake NokouÃ© | 500 |
| Forest | 8114.014 | Forest_170 | 0 | Lake NokouÃ© | 510 |
| Forest | 8175.657 | Forest_171 | 0 | Lake NokouÃ© | 520 |
| Forest | 3798.533 | Forest_172 | 0.032663 | Lake SÃ©lÃ© | 36.2 |
| Forest | 4105.333 | Forest_173 | 0.055663 | Lake SÃ©lÃ© | 44 |
| Forest | 4994.267 | Forest_174 | 0.026337 | Lake SÃ©lÃ© | 66.6 |
| Forest | 5572.467 | Forest_175 | 0.069888 | Lake SÃ©lÃ© | 81.3 |
| Forest | 6453.533 | Forest_176 | 0 | Lake SÃ©lÃ© | 103.7 |
| Forest | 7114.333 | Forest_177 | 0.066392 | Lake SÃ©lÃ© | 120.5 |
| Forest | 7349.961 | Forest_178 | 0.064128 | Lake SÃ©lÃ© | 142 |
| Forest | 7671.934 | Forest_179 | 0.038086 | Lake SÃ©lÃ© | 182 |
| Forest | 7983.443 | Forest_180 | 0.053167 | Lake SÃ©lÃ© | 220.7 |
| Forest | 8472.036 | Forest_181 | 0.043587 | Lake SÃ©lÃ© | 281.4 |
| Forest | 8762.616 | Forest_182 | 0.088608 | Lake SÃ©lÃ© | 317.5 |
| Forest | 9268.113 | Forest_183 | 0.013391 | Lake SÃ©lÃ© | 380.3 |
| Forest | 9454.857 | Forest_184 | 0 | Lake SÃ©lÃ© | 403.5 |
| Forest | 9603.77 | Forest_185 | 0.125633 | Lake SÃ©lÃ© | 422 |
| Forest | 9768.781 | Forest_186 | 0 | Lake SÃ©lÃ© | 442.5 |
| Forest | 9922.522 | Forest_187 | 0.074644 | Lake SÃ©lÃ© | 461.6 |
| Forest | 10072.24 | Forest_188 | 0.022746 | Lake SÃ©lÃ© | 480.2 |
| Forest | 10407.9 | Forest_189 | 0 | Lake SÃ©lÃ© | 521.9 |
| Forest | 10520.59 | Forest_190 | 0.048627 | Lake SÃ©lÃ© | 535.9 |
| Forest | 10737.92 | Forest_192 | 0.098274 | Lake SÃ©lÃ© | 562.9 |
| Forest | 10876.37 | Forest_193 | 0.018685 | Lake SÃ©lÃ© | 580.1 |
| Forest | 11039.77 | Forest_194 | 0 | Lake SÃ©lÃ© | 600.4 |
| Forest | 11172.58 | Forest_195 | 0.084414 | Lake SÃ©lÃ© | 616.9 |
| Forest | 11352.08 | Forest_198 | 0.0581 | Lake SÃ©lÃ© | 639.2 |
| Forest | 11453.5 | Forest_200 | 0.114278 | Lake SÃ©lÃ© | 651.8 |
| Forest | 11532.39 | Forest_201 | 0.031017 | Lake SÃ©lÃ© | 661.6 |
| Forest | 11672 | Forest_202 | 0 | Lake SÃ©lÃ© | 673.6 |
| Forest | 11978 | Forest_203 | 0.103446 | Lake SÃ©lÃ© | 688.9 |
| Forest | 12202.86 | Forest_204 | 0 | Lake SÃ©lÃ© | 700.2 |
| Forest | 1525.4 | Forest_207 | 0.009983 | YÃ©viÃ©dÃ© | 7 |
| Forest | 1764.374 | Forest_208 | 0.028719 | YÃ©viÃ©dÃ© | 17 |
| Forest | 2003.347 | Forest_209 | 0.017785 | YÃ©viÃ©dÃ© | 27 |
| Forest | 2242.321 | Forest_210 | 0.036084 | YÃ©viÃ©dÃ© | 37 |
| Forest | 2935.345 | Forest_211 | 0.0159 | YÃ©viÃ©dÃ© | 66 |
| Forest | 3174.318 | Forest_212 | 0.043317 | YÃ©viÃ©dÃ© | 76 |
| Forest | 3413.292 | Forest_213 | 0.057994 | YÃ©viÃ©dÃ© | 86 |
| Forest | 3628.368 | Forest_214 | 0.018325 | YÃ©viÃ©dÃ© | 95 |
| Forest | 3867.342 | Forest_215 | 0.04443 | YÃ©viÃ©dÃ© | 105 |
| Forest | 4106.316 | Forest_216 | 0.077813 | YÃ©viÃ©dÃ© | 115 |
| Forest | 4345.29 | Forest_217 | 0.062556 | YÃ©viÃ©dÃ© | 125 |
| Forest | 4751.545 | Forest_219 | 0.073037 | YÃ©viÃ©dÃ© | 142 |
| Forest | 4990.519 | Forest_220 | 0.040565 | YÃ©viÃ©dÃ© | 152 |
| Forest | 5229.492 | Forest_221 | 0.060758 | YÃ©viÃ©dÃ© | 162 |
| Forest | 5468.466 | Forest_222 | 0.036416 | YÃ©viÃ©dÃ© | 172 |
| Forest | 5707.439 | Forest_223 | 0.033809 | YÃ©viÃ©dÃ© | 182 |
| Forest | 5946.413 | Forest_224 | 0 | YÃ©viÃ©dÃ© | 192 |
| Forest | 6185.387 | Forest_225 | 0.049901 | YÃ©viÃ©dÃ© | 202 |
| Forest | 6424.36 | Forest_226 | 0.07797 | YÃ©viÃ©dÃ© | 212 |
| Forest | 6663.334 | Forest_227 | 0.076379 | YÃ©viÃ©dÃ© | 0 |
| Forest | 7004.849 | Forest_229 | 0.102221 | YÃ©viÃ©dÃ© | 242 |
| Forest | 7048.917 | Forest_230 | 0 | YÃ©viÃ©dÃ© | 252 |
| Forest | 7092.987 | Forest_231 | 0.087119 | YÃ©viÃ©dÃ© | 262 |
| Forest | 7137.056 | Forest_232 | 0.104389 | YÃ©viÃ©dÃ© | 272 |
| Forest | 7181.125 | Forest_233 | 0 | YÃ©viÃ©dÃ© | 282 |
| Forest | 7269.263 | Forest_234 | 0.040154 | YÃ©viÃ©dÃ© | 302 |
| Forest | 7313.333 | Forest_235 | 0.018325 | YÃ©viÃ©dÃ© | 312 |
| Forest | 7357.401 | Forest_236 | 0.012395 | YÃ©viÃ©dÃ© | 322 |
| Forest | 7392.657 | Forest_237 | 0.037715 | YÃ©viÃ©dÃ© | 330 |
| Forest | 7436.726 | Forest_238 | 0 | YÃ©viÃ©dÃ© | 340 |
| Forest | 7480.795 | Forest_239 | 0.020448 | YÃ©viÃ©dÃ© | 350 |
| Forest | 7635.037 | Forest_240 | 0.060397 | YÃ©viÃ©dÃ© | 385 |
| Forest | 7679.106 | Forest_241 | 0.079225 | YÃ©viÃ©dÃ© | 395 |
| Forest | 7723.175 | Forest_242 | 0.032752 | YÃ©viÃ©dÃ© | 405 |
| Forest | 7767.245 | Forest_243 | 0.052382 | YÃ©viÃ©dÃ© | 415 |
| Forest | 7811.314 | Forest_244 | 0.044597 | YÃ©viÃ©dÃ© | 425 |
| Forest | 7855.383 | Forest_245 | 0 | YÃ©viÃ©dÃ© | 435 |
| Forest | 7899.452 | Forest_246 | 0.030741 | YÃ©viÃ©dÃ© | 445 |
| Forest | 7943.521 | Forest_247 | 0.053234 | YÃ©viÃ©dÃ© | 455 |
| Savanna | 512 | NA | 0.129125 | Bemba ya | 10 |
| Savanna | 614 | NA | 0.143545 | Bemba ya | 12 |
| Savanna | 717 | NA | 0.128422 | Bemba ya | 14 |
| Savanna | 940 | NA | 0.148963 | Bemba ya | 16 |
| Savanna | 1163 | NA | 0.120536 | Bemba ya | 18 |
| Savanna | 1385 | NA | 0.138445 | Bemba ya | 20 |
| Savanna | 1608 | NA | 0.107932 | Bemba ya | 22 |
| Savanna | 1831 | NA | 0.13051 | Bemba ya | 24 |
| Savanna | 2054 | NA | 0.11623 | Bemba ya | 26 |
| Savanna | 2277 | NA | 0.13456 | Bemba ya | 28 |
| Savanna | 2722 | NA | 0.124696 | Bemba ya | 32 |
| Savanna | 205 | NA | 0.096495 | Bemba ya | 4 |
| Savanna | 307 | NA | 0.112536 | Bemba ya | 6 |
| Savanna | 410 | NA | 0.133549 | Bemba ya | 8 |
| Savanna | 7806.071 | NA | 0.003151 | Chemchane Sebkha 1 | 380 |
| Savanna | 8034.929 | NA | 0.018501 | Chemchane Sebkha 1 | 410 |
| Savanna | 8187.5 | NA | 0.005105 | Chemchane Sebkha 1 | 430 |
| Savanna | 8340.071 | NA | 0 | Chemchane Sebkha 1 | 450 |
| Savanna | 8416.357 | NA | 0.113866 | Chemchane Sebkha 1 | 460 |
| Savanna | 8645.214 | NA | 0 | Chemchane Sebkha 1 | 490 |
| Savanna | 8721.5 | NA | 0 | Chemchane Sebkha 1 | 500 |
| Savanna | 8797.786 | NA | 6.66E-05 | Chemchane Sebkha 1 | 510 |
| Savanna | 8874.071 | NA | 0.017707 | Chemchane Sebkha 1 | 520 |
| Savanna | 8950.357 | NA | 0.061883 | Chemchane Sebkha 1 | 530 |
| Savanna | 9026.643 | NA | 0 | Chemchane Sebkha 1 | 540 |
| Savanna | 9102.929 | NA | 0 | Chemchane Sebkha 1 | 550 |
| Savanna | 2049 | NA | 0 | Jikariya | 181 |
| Savanna | 2126 | NA | 0 | Jikariya | 186 |
| Savanna | 2246 | NA | 0 | Jikariya | 192 |
| Savanna | 2340 | NA | 0.173321 | Jikariya | 196 |
| Savanna | 2505 | NA | 0 | Jikariya | 203 |
| Savanna | 2881 | NA | 0 | Jikariya | 219 |
| Savanna | 3140 | NA | 0 | Jikariya | 230 |
| Savanna | 3258 | NA | 0 | Jikariya | 235 |
| Savanna | 258 | NA | 0 | Jikariya | 24 |
| Savanna | 3375 | NA | 0 | Jikariya | 240 |
| Savanna | 3493 | NA | 0 | Jikariya | 245 |
| Savanna | 3846 | NA | 0.169986 | Jikariya | 260 |
| Savanna | 3963 | NA | 0 | Jikariya | 265 |
| Savanna | 4199 | NA | 0 | Jikariya | 275 |
| Savanna | 4316 | NA | 0 | Jikariya | 280 |
| Savanna | 4458 | NA | 0 | Jikariya | 286 |
| Savanna | 4565 | NA | 0 | Jikariya | 291 |
| Savanna | 4672 | NA | 0 | Jikariya | 296 |
| Savanna | 4778 | NA | 0.033689 | Jikariya | 301 |
| Savanna | 4885 | NA | 0 | Jikariya | 306 |
| Savanna | 4992 | NA | 0 | Jikariya | 311 |
| Savanna | 5098 | NA | 0.058103 | Jikariya | 316 |
| Savanna | 5269 | NA | 0 | Jikariya | 324 |
| Savanna | 5375 | NA | 0 | Jikariya | 329 |
| Savanna | 5526 | NA | 0 | Jikariya | 336 |
| Savanna | 5639 | NA | 0 | Jikariya | 341 |
| Savanna | 5751 | NA | 0.061195 | Jikariya | 346 |
| Savanna | 5864 | NA | 0 | Jikariya | 351 |
| Savanna | 5976 | NA | 0.037644 | Jikariya | 356 |
| Savanna | 6089 | NA | 0.043492 | Jikariya | 361 |
| Savanna | 6202 | NA | 0.013101 | Jikariya | 366 |
| Savanna | 6314 | NA | 0 | Jikariya | 371 |
| Savanna | 6449 | NA | 0 | Jikariya | 377 |
| Savanna | 6562 | NA | 0.019385 | Jikariya | 382 |
| Savanna | 6674 | NA | 0 | Jikariya | 387 |
| Savanna | 6899 | NA | 0 | Jikariya | 397 |
| Savanna | 7124 | NA | 0 | Jikariya | 407 |
| Savanna | 7349 | NA | 0.012381 | Jikariya | 417 |
| Savanna | 7620 | NA | 0 | Jikariya | 429 |
| Savanna | 7845 | NA | 0 | Jikariya | 439 |
| Savanna | 8092 | NA | 0 | Jikariya | 450 |
| Savanna | 8317 | NA | 0 | Jikariya | 460 |
| Savanna | 8542 | NA | 0 | Jikariya | 470 |
| Savanna | 8768 | NA | 0 | Jikariya | 480 |
| Savanna | 8993 | NA | 0 | Jikariya | 490 |
| Savanna | 9218 | NA | 0 | Jikariya | 500 |
| Savanna | 9443 | NA | 0 | Jikariya | 510 |
| Savanna | 9555 | NA | 0 | Jikariya | 515 |
| Savanna | 9780 | NA | 0.035676 | Jikariya | 525 |
| Savanna | 9893 | NA | 0 | Jikariya | 530 |
| Savanna | 504 | NA | 0 | Jikariya | 54 |
| Savanna | 10090 | NA | 0 | Jikariya | 540 |
| Savanna | 10216 | NA | 0 | Jikariya | 551 |
| Savanna | 10330 | NA | 0 | Jikariya | 561 |
| Savanna | 10445 | NA | 0 | Jikariya | 571 |
| Savanna | 10559 | NA | 0 | Jikariya | 581 |
| Savanna | 10673 | NA | 0 | Jikariya | 591 |
| Savanna | 10787 | NA | 0 | Jikariya | 601 |
| Savanna | 11073 | NA | 0.108791 | Jikariya | 626 |
| Savanna | 11130 | NA | 0.151099 | Jikariya | 631 |
| Savanna | 11244 | NA | 0.12749 | Jikariya | 641 |
| Savanna | 11370 | NA | 0.169986 | Jikariya | 652 |
| Savanna | 5148.45 | NA | 0.063641 | Kuluwus Oasis | 173 |
| Savanna | 5238.601 | NA | 0.088759 | Kuluwus Oasis | 176 |
| Savanna | 5569.153 | NA | 0.051182 | Kuluwus Oasis | 187 |
| Savanna | 5899.706 | NA | 0.015504 | Kuluwus Oasis | 198 |
| Savanna | 6230.258 | NA | 0.028262 | Kuluwus Oasis | 209 |
| Savanna | 6380.51 | NA | 0 | Kuluwus Oasis | 214 |
| Savanna | 6681.012 | NA | 0.02117 | Kuluwus Oasis | 224 |
| Savanna | 6981.514 | NA | 0.011301 | Kuluwus Oasis | 234 |
| Savanna | 7312.067 | NA | 0.039502 | Kuluwus Oasis | 245 |
| Savanna | 7717.745 | NA | 0.03349 | Kuluwus Oasis | 258.5 |
| Savanna | 8033.273 | NA | 0.023468 | Kuluwus Oasis | 269 |
| Savanna | 8333.775 | NA | 0.039127 | Kuluwus Oasis | 279 |
| Savanna | 8604.228 | NA | 0.07222 | Kuluwus Oasis | 288 |
| Savanna | 9265.333 | NA | 0.02378 | Kuluwus Oasis | 310 |
| Savanna | 9490.709 | NA | 0.011301 | Kuluwus Oasis | 317.5 |
| Savanna | 9716.086 | NA | 0.038422 | Kuluwus Oasis | 325 |
| Savanna | 10016.59 | NA | 0.025866 | Kuluwus Oasis | 335 |
| Savanna | 10317.09 | NA | 0.081685 | Kuluwus Oasis | 345 |
| Savanna | 10647.64 | NA | 0.030344 | Kuluwus Oasis | 356 |
| Savanna | 10948.15 | NA | 0.13376 | Kuluwus Oasis | 366 |
| Savanna | 0 | NA | 0.021501 | Mare d'Oursi | 0 |
| Savanna | 1564 | NA | 0 | Mare d'Oursi | 101 |
| Savanna | 1652 | NA | 0 | Mare d'Oursi | 105 |
| Savanna | 116 | NA | 0.007978 | Mare d'Oursi | 11 |
| Savanna | 1874 | NA | 0.007977 | Mare d'Oursi | 115 |
| Savanna | 2007 | NA | 0 | Mare d'Oursi | 121 |
| Savanna | 2229 | NA | 0.007091 | Mare d'Oursi | 131 |
| Savanna | 2318 | NA | 0.007978 | Mare d'Oursi | 135 |
| Savanna | 2540 | NA | 0 | Mare d'Oursi | 145 |
| Savanna | 158 | NA | 0.039392 | Mare d'Oursi | 15 |
| Savanna | 2673 | NA | 0.047599 | Mare d'Oursi | 151 |
| Savanna | 2761 | NA | 0.153644 | Mare d'Oursi | 155 |
| Savanna | 2879 | NA | 0.007978 | Mare d'Oursi | 161 |
| Savanna | 2938 | NA | 0 | Mare d'Oursi | 165 |
| Savanna | 3012 | NA | 0.059269 | Mare d'Oursi | 170 |
| Savanna | 3174 | NA | 0 | Mare d'Oursi | 181 |
| Savanna | 3307 | NA | 0 | Mare d'Oursi | 190 |
| Savanna | 3469 | NA | 0.050387 | Mare d'Oursi | 201 |
| Savanna | 221 | NA | 0.005983 | Mare d'Oursi | 21 |
| Savanna | 3675 | NA | 0 | Mare d'Oursi | 215 |
| Savanna | 3823 | NA | 0 | Mare d'Oursi | 225 |
| Savanna | 3911 | NA | 0.084094 | Mare d'Oursi | 231 |
| Savanna | 263 | NA | 0.007978 | Mare d'Oursi | 25 |
| Savanna | 4206 | NA | 0 | Mare d'Oursi | 251 |
| Savanna | 4265 | NA | 0.137951 | Mare d'Oursi | 255 |
| Savanna | 305 | NA | 0 | Mare d'Oursi | 29 |
| Savanna | 368 | NA | 0.055551 | Mare d'Oursi | 35 |
| Savanna | 431 | NA | 0.035547 | Mare d'Oursi | 41 |
| Savanna | 473 | NA | 0.053601 | Mare d'Oursi | 45 |
| Savanna | 53 | NA | 0.044452 | Mare d'Oursi | 5 |
| Savanna | 536 | NA | 0.007091 | Mare d'Oursi | 51 |
| Savanna | 578 | NA | 0.052684 | Mare d'Oursi | 55 |
| Savanna | 677 | NA | 0.045828 | Mare d'Oursi | 61 |
| Savanna | 765 | NA | 0 | Mare d'Oursi | 65 |
| Savanna | 898 | NA | 0.007091 | Mare d'Oursi | 71 |
| Savanna | 987 | NA | 0.007978 | Mare d'Oursi | 75 |
| Savanna | 1120 | NA | 0.047599 | Mare d'Oursi | 81 |
| Savanna | 1209 | NA | 0.007091 | Mare d'Oursi | 85 |
| Savanna | 1342 | NA | 0 | Mare d'Oursi | 91 |
| Savanna | 1338.772 | NA | 0 | Tilla | 101.5 |
| Savanna | 1386.315 | NA | 0.025771 | Tilla | 110.5 |
| Savanna | 402.5 | NA | 0 | Tilla | 12 |
| Savanna | 1436.5 | NA | 0.033074 | Tilla | 120 |
| Savanna | 1493.182 | NA | 0.028812 | Tilla | 132.5 |
| Savanna | 1540.796 | NA | 0 | Tilla | 143 |
| Savanna | 1588.409 | NA | 0.040096 | Tilla | 153.5 |
| Savanna | 1636.022 | NA | 0 | Tilla | 164 |
| Savanna | 1685.902 | NA | 0.003843 | Tilla | 175 |
| Savanna | 1731.248 | NA | 0 | Tilla | 185 |
| Savanna | 1781.129 | NA | 0 | Tilla | 196 |
| Savanna | 1828.561 | NA | 0 | Tilla | 206.5 |
| Savanna | 1875.904 | NA | 0 | Tilla | 217 |
| Savanna | 1925.5 | NA | 0.045942 | Tilla | 228 |
| Savanna | 608.5 | NA | 0 | Tilla | 24 |
| Savanna | 1984.114 | NA | 0.053689 | Tilla | 241 |
| Savanna | 2033.711 | NA | 0.060348 | Tilla | 252 |
| Savanna | 2083.307 | NA | 0.023469 | Tilla | 263 |
| Savanna | 2130.649 | NA | 0.046185 | Tilla | 273.5 |
| Savanna | 2180.246 | NA | 0 | Tilla | 284.5 |
| Savanna | 2229.842 | NA | 0 | Tilla | 295.5 |
| Savanna | 2279.438 | NA | 0.0191 | Tilla | 306.5 |
| Savanna | 2361.418 | NA | 0.0249 | Tilla | 317 |
| Savanna | 2519.876 | NA | 0 | Tilla | 328 |
| Savanna | 2671.131 | NA | 0.041085 | Tilla | 338.5 |
| Savanna | 2793.575 | NA | 0.081125 | Tilla | 347 |
| Savanna | 814.5 | NA | 0.020332 | Tilla | 36 |
| Savanna | 2980.843 | NA | 0.032501 | Tilla | 360 |
| Savanna | 3110.49 | NA | 0.015061 | Tilla | 369 |
| Savanna | 3225.732 | NA | 0.044509 | Tilla | 377 |
| Savanna | 3413 | NA | 0.048438 | Tilla | 390 |
| Savanna | 3665.496 | NA | 0.021486 | Tilla | 403 |
| Savanna | 3840.301 | NA | 0.080994 | Tilla | 412 |
| Savanna | 4092.797 | NA | 0 | Tilla | 425 |
| Savanna | 4306.447 | NA | 0.024245 | Tilla | 436 |
| Savanna | 4529.809 | NA | 0.029981 | Tilla | 447.5 |
| Savanna | 977.5833 | NA | 0 | Tilla | 45.5 |
| Savanna | 4734.663 | NA | 0.001984 | Tilla | 459 |
| Savanna | 4921.167 | NA | 0.020273 | Tilla | 470 |
| Savanna | 5107.672 | NA | 0.091675 | Tilla | 481 |
| Savanna | 5294.178 | NA | 0 | Tilla | 492 |
| Savanna | 5497.638 | NA | 0.037252 | Tilla | 504 |
| Savanna | 5684.143 | NA | 0.050308 | Tilla | 515 |
| Savanna | 5862.17 | NA | 0.081516 | Tilla | 525.5 |
| Savanna | 6023.243 | NA | 0.066955 | Tilla | 535 |
| Savanna | 6192.792 | NA | 0.071994 | Tilla | 545 |
| Savanna | 1093.13 | NA | 0 | Tilla | 55 |
| Savanna | 6382.393 | NA | 0.047748 | Tilla | 555 |
| Savanna | 6665.938 | NA | 0.045942 | Tilla | 567.5 |
| Savanna | 6881.432 | NA | 0.04592 | Tilla | 577 |
| Savanna | 7176.318 | NA | 0 | Tilla | 590 |
| Savanna | 299.5 | NA | 0.090523 | Tilla | 6 |
| Savanna | 7403.154 | NA | 0 | Tilla | 600 |
| Savanna | 7698.041 | NA | 0.083817 | Tilla | 613 |
| Savanna | 7913.535 | NA | 0.081826 | Tilla | 622.5 |
| Savanna | 8197.08 | NA | 0.06624 | Tilla | 635 |
| Savanna | 1140.674 | NA | 0 | Tilla | 64 |
| Savanna | 8423.916 | NA | 0.04809 | Tilla | 645 |
| Savanna | 8639.41 | NA | 0.081034 | Tilla | 654.5 |
| Savanna | 8786.854 | NA | 0.031178 | Tilla | 661 |
| Savanna | 8991.006 | NA | 0.023084 | Tilla | 670 |
| Savanna | 9138.449 | NA | 0.056109 | Tilla | 676.5 |
| Savanna | 9306.038 | NA | 0.053187 | Tilla | 686 |
| Savanna | 9405.576 | NA | 0.032504 | Tilla | 692.5 |
| Savanna | 9551.055 | NA | 0.064036 | Tilla | 702 |
| Savanna | 9750.132 | NA | 0.046271 | Tilla | 715 |
| Savanna | 9903.267 | NA | 0.038389 | Tilla | 725 |
| Savanna | 1190.859 | NA | 0.067701 | Tilla | 73.5 |
| Savanna | 10048.75 | NA | 0.041614 | Tilla | 734.5 |
| Savanna | 10194.22 | NA | 0.056137 | Tilla | 744 |
| Savanna | 10347.36 | NA | 0.003457 | Tilla | 754 |
| Savanna | 10485.18 | NA | 0 | Tilla | 763 |
| Savanna | 10638.32 | NA | 0.07391 | Tilla | 773 |
| Savanna | 10783.8 | NA | 0 | Tilla | 782.5 |
| Savanna | 10929.28 | NA | 0 | Tilla | 792 |
| Savanna | 11106.89 | NA | 0.026991 | Tilla | 799 |
| Savanna | 11853.97 | NA | 0.026991 | Tilla | 811 |
| Savanna | 12210.31 | NA | 0.01693 | Tilla | 823.5 |
| Savanna | 1241.043 | NA | 0.007926 | Tilla | 83 |
| Savanna | 12330.24 | NA | 0 | Tilla | 833 |
| Savanna | 1278.022 | NA | 0.046185 | Tilla | 90 |
| Savanna | 3105.982 | NA | 0 | lake Bal | 130 |
| Savanna | 3583.376 | NA | 0.007871 | lake Bal | 147 |
| Savanna | 3731.297 | NA | 0 | lake Bal | 152 |
| Savanna | 3879.217 | NA | 0.066935 | lake Bal | 157 |
| Savanna | 4027.138 | NA | 0.041003 | lake Bal | 162 |
| Savanna | 4175.059 | NA | 0 | lake Bal | 167 |
| Savanna | 5062.582 | NA | 0.006996 | lake Bal | 197 |
| Savanna | 5654.264 | NA | 0.046445 | lake Bal | 217 |
| Savanna | 5950.105 | NA | 0 | lake Bal | 227 |
| Savanna | 6305.114 | NA | 0.119467 | lake Bal | 239 |
| Savanna | 6833.2 | NA | 0 | lake Bal | 259 |
| Savanna | 7031.2 | NA | 0 | lake Bal | 269 |
| Savanna | 7249 | NA | 0 | lake Bal | 280 |
| Savanna | 7447 | NA | 0.013113 | lake Bal | 290 |
| Savanna | 7645 | NA | 0 | lake Bal | 300 |
| Savanna | 7843 | NA | 0 | lake Bal | 310 |
| Savanna | 7987 | NA | 0.007871 | lake Bal | 318 |
| Savanna | 8122 | NA | 0 | lake Bal | 327 |
| Savanna | 8197 | NA | 0.010999 | lake Bal | 332 |
| Savanna | 8316.919 | NA | 0.068804 | lake Bal | 339 |
| Savanna | 8509.544 | NA | 0.101351 | lake Bal | 349 |
| Savanna | 8721.432 | NA | 0 | lake Bal | 360 |
| Savanna | 9067.52 | NA | 0 | lake Bal | 379 |
| Savanna | 9203.291 | NA | 0.007871 | lake Bal | 389 |
| Savanna | 9339.062 | NA | 0 | lake Bal | 399 |
| Savanna | 9474.833 | NA | 0 | lake Bal | 409 |
| Savanna | 9542.719 | NA | 0 | lake Bal | 414 |
| Savanna | 10167.27 | NA | 0 | lake Bal | 460 |
| Savanna | 528.0431 | NA | 0 | lake Bal | 48 |
| Savanna | 10438.81 | NA | 0 | lake Bal | 480 |
| Savanna | 10588.16 | NA | 0 | lake Bal | 491 |
| Savanna | 10723.93 | NA | 0 | lake Bal | 501 |
| Savanna | 10859.7 | NA | 0 | lake Bal | 511 |
| Savanna | 10981.89 | NA | 0 | lake Bal | 520 |
| Savanna | 11253.43 | NA | 0 | lake Bal | 540 |
| Savanna | 593.175 | NA | 0 | lake Bal | 55 |
| Savanna | 11905.13 | NA | 0 | lake Bal | 588 |
| Savanna | 987.975 | NA | 0 | lake Bal | 63 |
| Savanna | 5156 | NA | 0 | lake Chad | 15.25 |
| Savanna | 5271 | NA | 0.004887 | lake Chad | 20.25 |
| Savanna | 5387 | NA | 0.004887 | lake Chad | 25.25 |
| Savanna | 5438 | NA | 0 | lake Chad | 30.25 |
| Savanna | 5482 | NA | 0.007871 | lake Chad | 35.25 |
| Savanna | 5537 | NA | 0 | lake Chad | 40.75 |
| Savanna | 5642 | NA | 0.099893 | lake Chad | 45.25 |
| Savanna | 5759 | NA | 0 | lake Chad | 50.25 |
| Savanna | 5864 | NA | 0 | lake Chad | 54.75 |
| Savanna | 6080 | NA | 0 | lake Chad | 65.25 |
| Savanna | 6183 | NA | 0.004344 | lake Chad | 70.25 |
| Savanna | 6285 | NA | 0.004344 | lake Chad | 75.25 |
| Savanna | 6490 | NA | 0 | lake Chad | 85.25 |
| Savanna | 2224 | NA | 0.031452 | lake guier | 100 |
| Savanna | 2451 | NA | 0.057364 | lake guier | 112 |
| Savanna | 2682 | NA | 0.026634 | lake guier | 125 |
| Savanna | 3100 | NA | 0.028436 | lake guier | 150 |
| Savanna | 426 | NA | 0.052499 | lake guier | 17 |
| Savanna | 3562 | NA | 0.016764 | lake guier | 175 |
| Savanna | 3964 | NA | 0.019894 | lake guier | 200 |
| Savanna | 4371 | NA | 0.013394 | lake guier | 225 |
| Savanna | 4736 | NA | 0.024724 | lake guier | 250 |
| Savanna | 5136 | NA | 0.01598 | lake guier | 275 |
| Savanna | 5493 | NA | 0.01742 | lake guier | 300 |
| Savanna | 5854 | NA | 0.011903 | lake guier | 325 |
| Savanna | 863 | NA | 0.047887 | lake guier | 35 |
| Savanna | 6200 | NA | 0.011797 | lake guier | 350 |
| Savanna | 6534 | NA | 0.015366 | lake guier | 375 |
| Savanna | 6853 | NA | 0.002151 | lake guier | 400 |
| Savanna | 7156 | NA | 0.001081 | lake guier | 425 |
| Savanna | 7401 | NA | 0.002718 | lake guier | 450 |
| Savanna | 7869 | NA | 0.003094 | lake guier | 475 |
| Savanna | 1216 | NA | 0.042559 | lake guier | 50 |
| Savanna | 8428 | NA | 0.001567 | lake guier | 500 |
| Savanna | 8957 | NA | 0.00231 | lake guier | 525 |
| Savanna | 9434 | NA | 0.004802 | lake guier | 550 |
| Savanna | 9913 | NA | 7.24E-04 | lake guier | 575 |
| Savanna | 10376 | NA | 0.001749 | lake guier | 600 |
| Savanna | 10597 | NA | 0.002426 | lake guier | 612 |
| Savanna | 10862 | NA | 0.007431 | lake guier | 627 |
| Savanna | 11284 | NA | 0.001191 | lake guier | 650 |
| Savanna | 1748 | NA | 0.070237 | lake guier | 75 |
| Savanna | 3612.5 | NA | 0.005464 | lake lompoul | 111 |
| Savanna | 3725 | NA | 0.006566 | lake lompoul | 120 |
| Savanna | 3891.19 | NA | 0.011175 | lake lompoul | 131 |
| Savanna | 4591.429 | NA | 9.57E-04 | lake lompoul | 148 |
| Savanna | 2412.5 | NA | 0.003837 | lake lompoul | 15 |
| Savanna | 5126.905 | NA | 0.004642 | lake lompoul | 161 |
| Savanna | 5497.619 | NA | 0.009327 | lake lompoul | 170 |
| Savanna | 6197.857 | NA | 0.006373 | lake lompoul | 187 |
| Savanna | 6321.429 | NA | 0.010647 | lake lompoul | 190 |
| Savanna | 2250 | NA | 0.00899 | lake lompoul | 2 |
| Savanna | 6856.905 | NA | 0.004546 | lake lompoul | 203 |
| Savanna | 7227.619 | NA | 0.003464 | lake lompoul | 212 |
| Savanna | 7433.571 | NA | 0.001537 | lake lompoul | 217 |
| Savanna | 7804.286 | NA | 0.015295 | lake lompoul | 226 |
| Savanna | 8216.19 | NA | 0.009285 | lake lompoul | 236 |
| Savanna | 8834.048 | NA | 0.017379 | lake lompoul | 251 |
| Savanna | 9493.096 | NA | 0.006742 | lake lompoul | 267 |
| Savanna | 2575 | NA | 0.005406 | lake lompoul | 28 |
| Savanna | 10069.76 | NA | 0.001011 | lake lompoul | 281 |
| Savanna | 10605.24 | NA | 0.002705 | lake lompoul | 294 |
| Savanna | 10893.57 | NA | 0.003139 | lake lompoul | 301 |
| Savanna | 11140.71 | NA | 0.003372 | lake lompoul | 307 |
| Savanna | 11511.43 | NA | 0.007608 | lake lompoul | 316 |
| Savanna | 12088.1 | NA | 7.87E-04 | lake lompoul | 330 |
| Savanna | 2662.5 | NA | 0.008978 | lake lompoul | 35 |
| Savanna | 2825 | NA | 0.006674 | lake lompoul | 48 |
| Savanna | 2975 | NA | 0.003564 | lake lompoul | 60 |
| Savanna | 3100 | NA | 0.007057 | lake lompoul | 70 |
| Savanna | 3200 | NA | 0.010937 | lake lompoul | 78 |
| Savanna | 3375 | NA | 0.007333 | lake lompoul | 92 |
| Savanna | 4471 | NA | 0 | potou | 110 |
| Savanna | 4762 | NA | 0.080953 | potou | 121 |
| Savanna | 5026 | NA | 0.095644 | potou | 131 |
| Savanna | 6029 | NA | 0 | potou | 169 |
| Savanna | 6346 | NA | 0.006996 | potou | 181 |
| Savanna | 1240 | NA | 0.076417 | potou | 19 |
| Savanna | 7112 | NA | 0.104902 | potou | 210 |
| Savanna | 7376 | NA | 0 | potou | 220 |
| Savanna | 7640 | NA | 0.004908 | potou | 230 |
| Savanna | 7904 | NA | 0.022604 | potou | 240 |
| Savanna | 8168 | NA | 0.066162 | potou | 250 |
| Savanna | 1606 | NA | 0.136313 | potou | 28 |
| Savanna | 588 | NA | 0.051638 | potou | 3 |
| Savanna | 2053 | NA | 0.006996 | potou | 39 |
| Savanna | 2257 | NA | 0.110079 | potou | 44 |
| Savanna | 2583 | NA | 0.067917 | potou | 52 |
| Savanna | 3274 | NA | 0.10223 | potou | 69 |
| Savanna | 792 | NA | 0 | potou | 8 |
| Savanna | 3679 | NA | 0.033887 | potou | 80 |
| Savanna | 3890 | NA | 1.07E-04 | potou | 88 |
| Savanna | 4181 | NA | 0.057796 | potou | 99 |

**Supplementary Table S4.** Temporal trends in taxonomic richness, Shannon diversity, and evenness for forest and savanna assemblages across West Africa, grouped into 500‑year age bins. Values represent mean diversity metrics per bin.

| Biome | Age_bin | n_samples | Richness_mean | Shannon_mean | Evenness_mean |
| --- | --- | --- | --- | --- | --- |
| Forest | 0-500 | 1 | 32 | 1.444809 | 0.416884 |
| Forest | 500-1000 | 4 | 29.25 | 1.118424 | 0.332582 |
| Forest | 1000-1500 | 3 | 27 | 1.715597 | 0.579382 |
| Forest | 1500-2000 | 5 | 34.4 | 2.170347 | 0.627691 |
| Forest | 2000-2500 | 8 | 37 | 2.332417 | 0.689096 |
| Forest | 2500-3000 | 5 | 35.4 | 1.864812 | 0.519627 |
| Forest | 3000-3500 | 11 | 33.27273 | 1.399006 | 0.413056 |
| Forest | 3500-4000 | 8 | 21 | 1.441486 | 0.496777 |
| Forest | 4000-4500 | 6 | 18.5 | 1.246618 | 0.418393 |
| Forest | 4500-5000 | 10 | 25.2 | 1.528297 | 0.441449 |
| Forest | 5000-5500 | 12 | 31.91667 | 2.011569 | 0.591166 |
| Forest | 5500-6000 | 11 | 33.90909 | 2.001162 | 0.552712 |
| Forest | 6000-6500 | 13 | 25.61538 | 1.743694 | 0.525372 |
| Forest | 6500-7000 | 25 | 20.36 | 1.719992 | 0.574115 |
| Forest | 7000-7500 | 62 | 20.1129 | 1.805225 | 0.58328 |
| Forest | 7500-8000 | 28 | 20.14286 | 1.215922 | 0.383182 |
| Forest | 8000-8500 | 10 | 25 | 1.864582 | 0.633431 |
| Forest | 8500-9000 | 1 | 45 | 2.07205 | 0.544322 |
| Forest | 9000-9500 | 2 | 35.5 | 1.94863 | 0.573444 |
| Forest | 9500-10000 | 3 | 32.66667 | 1.973786 | 0.572953 |
| Forest | 10000-10500 | 2 | 30 | 1.965571 | 0.581759 |
| Forest | 10500-11000 | 4 | 24.5 | 1.702479 | 0.536569 |
| Forest | 11000-11500 | 7 | 26.42857 | 1.672466 | 0.523746 |
| Forest | 11500-12000 | 3 | 25 | 1.623991 | 0.507316 |
| Forest | 12000-12500 | 1 | 22 | 1.679196 | 0.543246 |
| Forest | 12500-13000 | 2 | 34.5 | 1.782761 | 0.50487 |
| Savanna | 0-500 | 37 | 13.78378 | 1.0672 | 0.429195 |
| Savanna | 500-1000 | 29 | 16.82759 | 1.137383 | 0.418597 |
| Savanna | 1000-1500 | 23 | 21.17391 | 1.032911 | 0.355779 |
| Savanna | 1500-2000 | 25 | 21.12 | 0.97369 | 0.344285 |
| Savanna | 2000-2500 | 23 | 21.47826 | 1.03307 | 0.340356 |
| Savanna | 2500-3000 | 24 | 22.41667 | 1.211409 | 0.412513 |
| Savanna | 3000-3500 | 23 | 20.08696 | 1.074711 | 0.368895 |
| Savanna | 3500-4000 | 22 | 24.18182 | 1.444836 | 0.459951 |
| Savanna | 4000-4500 | 17 | 18.82353 | 1.119704 | 0.401909 |
| Savanna | 4500-5000 | 14 | 21.71429 | 1.158608 | 0.388729 |
| Savanna | 5000-5500 | 23 | 24.56522 | 1.505104 | 0.471524 |
| Savanna | 5500-6000 | 19 | 23.05263 | 1.436087 | 0.459744 |
| Savanna | 6000-6500 | 21 | 25.2381 | 1.584229 | 0.491436 |
| Savanna | 6500-7000 | 14 | 24.14286 | 1.357448 | 0.426749 |
| Savanna | 7000-7500 | 14 | 22.57143 | 1.347322 | 0.43178 |
| Savanna | 7500-8000 | 14 | 20.35714 | 1.21469 | 0.41863 |
| Savanna | 8000-8500 | 16 | 20.4375 | 1.188787 | 0.404911 |
| Savanna | 8500-9000 | 18 | 21.55556 | 1.250452 | 0.417791 |
| Savanna | 9000-9500 | 15 | 20.13333 | 1.240429 | 0.426841 |
| Savanna | 9500-10000 | 10 | 23.5 | 1.226326 | 0.390741 |
| Savanna | 10000-10500 | 16 | 22.125 | 1.181428 | 0.382675 |
| Savanna | 10500-11000 | 18 | 19.94444 | 1.094669 | 0.363607 |
| Savanna | 11000-11500 | 13 | 16.46154 | 0.889034 | 0.319261 |
| Savanna | 11500-12000 | 7 | 12 | 0.948636 | 0.417944 |
| Savanna | 12000-12500 | 4 | 15.5 | 0.985052 | 0.409472 |
| Savanna | 12500-13000 | 6 | 8.333333 | 0.746842 | 0.403857 |
| Savanna | 13000-13500 | 3 | 17 | 1.542454 | 0.520347 |
| Savanna | 13500-14000 | 2 | 24.5 | 2.176287 | 0.680032 |
| Savanna | 14000-14500 | 2 | 20.5 | 2.100389 | 0.696625 |
| Savanna | 15000-15500 | 1 | 21 | 1.632407 | 0.536178 |

**Supplementary Table S5. West African Functional-Ecological Classification (WAFEC) Matrix.**
*A comprehensive list of taxa categorised by growth form, drought and disturbance tolerance, successional status, ecological importance, primary human usage, and biogeographic regions, based on West African pollen data. These classifications were validated against trustworthy botanical references and regional floras. This systematisation provides a standardised basis for vegetation–climate interactions within the West African biome mosaic.*

| Taxon | Zone | Form | Drought | Disturbance | Succession | Human Use | Indicator | Reference |
| --- | --- | --- | --- | --- | --- | --- | --- | --- |
| Alnus | Extra-regional | Tree/Shrub | Low | Low | Climax | No | Moist Forest | White (1983); African Plant Database (2024) |
| Artemisia | Extra-regional | Shrub | High | High | Pioneer | Medicinal | Dry Phase | White (1983); African Plant Database (2024) |
| Betula | Extra-regional | Tree | Low | Low | Climax | Medicinal | Moist Forest | White (1983); African Plant Database (2024) |
| Corylus | Extra-regional | Tree/Shrub | Low | Low | Climax | Medicinal | Moist Forest | White (1983); African Plant Database (2024) |
| Dipsaceae-type | Extra-regional | Herb | Moderate | Moderate | Mid | Medicinal | Temperate edge signal | White (1983); African Plant Database (2024) |
| Frankenia-type | Extra-regional | Shrub | High | High | Pioneer | Medicinal | Arid coastal/dry marker | White (1983); African Plant Database (2024) |
| Hedera | Extra-regional | Climber | Low | Low | Climax | Ornamental | Temperate forest indicator | White (1983); African Plant Database (2024) |
| Humulus | Extra-regional | Climber | Low | Low | Climax | Medicinal, ornamental | Temperate forest liana | White (1983); African Plant Database (2024) |
| Juniperus | Extra-regional | Tree/Shrub | High | Moderate | Pioneer | Timber, medicinal | Arid steppe/edge | White (1983); African Plant Database (2024) |
| Larix | Extra-regional | Tree | Low | Low | Climax | Timber | Boreal/temperate forest | White (1983); African Plant Database (2024) |
| Lavandula-type | Extra-regional | Herb | Moderate | High | Mid | Aromatic | Dry disturbance | White (1983); African Plant Database (2024) |
| Lotus arabicus-type | Extra-regional | Herb | High | High | Pioneer | Fodder | Dry ruderal | Burkill (1985); African Plant Database (2024) |
| Pinus | Extra-regional | Tree | Moderate | Moderate | Mid | Timber, resin | Temperate/boreal forests | White (1983); African Plant Database (2024) |
| Plantago | Extra-regional | Herb | Moderate | High | Pioneer | Medicinal | Temperate disturbance | White (1983); African Plant Database (2024) |
| Polygonum | Extra-regional | Herb | Moderate | High | Pioneer | Medicinal | Temperate wetland/ruderal | White (1983); African Plant Database (2024) |
| Pteridium aquilinum | Extra-regional | Fern | Low | Low | Climax | None | Temperate/boreal fern | White (1983); African Plant Database (2024) |
| Quercus | Extra-regional | Tree | Low | Low | Climax | Timber, acorns | Temperate forest | White (1983); African Plant Database (2024) |
| Ranunculaceae | Extra-regional | Herb | Moderate | Moderate | Mid | Medicinal | Temperate wetland/grassland | White (1983); African Plant Database (2024) |
| Salix | Extra-regional | Tree/Shrub | Low | Moderate | Mid | Medicinal, timber | Temperate riparian/edge | White (1983); African Plant Database (2024) |
| Ulmus | Extra-regional | Tree | Low | Low | Climax | Timber | Temperate forest | White (1983); African Plant Database (2024) |
| Abutilon | Guinean | Herb | Moderate | High | Pioneer | Medicinal | Moist disturbance indicator | Burkill (1985); African Plant Database (2024) |
| Acalypha | Guinean | Shrub | Moderate | High | Pioneer | Medicinal | Moist forest edge/disturbance | Burkill (1985); African Plant Database (2024) |
| Acanthaceae | Guinean | Shrub | Moderate | Moderate | Early-Mid | Medicinal | Moist woodland understory | Burkill (1985); African Plant Database (2024) |
| Acanthus | Guinean | Herb | Moderate | Moderate | Mid | Medicinal | Moist Undergrowth | African Plant Database (2024) |
| Acanthus-type | Guinean | Herb | Low | Moderate | Mid | Medicinal | Forest understory herb | Burkill (1985); African Plant Database (2024) |
| Aidia | Guinean | Shrub | Moderate | Moderate | Mid | Medicinal, edible fruit | Moist forest, woodland | Hawthorne & Jongkind (2006) |
| Alafia-type | Guinean | Climber | Low | Low | Climax | Medicinal | Moist Forest Core | Burkill (1985); African Plant Database (2024) |
| Alchornea | Guinean | Shrub | Low | Moderate | Mid | Medicinal | Moist forest understory | Burkill (1985); African Plant Database (2024) |
| Allophylus | Guinean | Shrub | Low | Low | Climax | Medicinal | Forest/shade-tolerant shrub | Burkill (1985); African Plant Database (2024) |
| Alstonia congensis | Guinean | Tree | Low | Low | Climax | Medicinal, timber | Moist Forest Core | Burkill (1985); African Plant Database (2024) |
| Alternanthera | Guinean | Herb | Low | High | Pioneer | Medicinal | Moist agricultural disturbance | Burkill (1985); African Plant Database (2024) |
| Amanoa-type | Guinean | Tree | Low | Low | Climax | Medicinal | Moist Forest Core | Burkill (1985); African Plant Database (2024) |
| Annonaceae | Guinean | Tree | Low | Low | Climax | Fruit, medicinal | Moist Forest Core | Burkill (1985); African Plant Database (2024) |
| Anthocleista | Guinean | Tree | Low | Moderate | Mid | Medicinal | Moist Forest Core | Burkill (1985); African Plant Database (2024) |
| Anthonotha | Guinean | Tree | Low | Low | Climax | Timber | Moist Forest Core | Burkill (1985); African Plant Database (2024) |
| Anthostema | Guinean | Tree | Low | Low | Climax | Medicinal | Moist Forest Core | Burkill (1985); African Plant Database (2024) |
| Antidesma venosum | Guinean | Tree | Low | Low | Climax | Fruit, medicinal | Moist Forest Core | Burkill (1985); African Plant Database (2024) |
| Antrocaryon-type | Guinean | Tree | Low | Low | Climax | Timber | Moist Forest Core | Burkill (1985); African Plant Database (2024) |
| Apocynaceae undiff | Guinean | Shrub/Tree | Low | Moderate | Mid | Medicinal | Forest and moist savanna understory | PROTA (2004) |
| Araliaceae undiff. | Guinean | Tree | Low | Low | Climax | Medicinal | Moist Forest Core | Burkill (1985); African Plant Database (2024) |
| Arecaceae | Guinean | Tree | Low | Low | Climax | Palm products (oil, fruit) | Moist Forest Core | PROTA (2004) |
| Asystasia gangetica-type | Guinean | Herb | Low | Moderate | Mid | Cover crop, ornamental | Forest margin disturbance | Burkill (1985); African Plant Database (2024) |
| Barleria | Guinean | Herb | Moderate | High | Pioneer | Medicinal | Savanna/woodland edge | Burkill (1985); African Plant Database (2024) |
| Berlinia | Guinean | Tree | Low | Low | Climax | Timber | Moist Forest Core | PROTA (2004) |
| Bosqueia-type | Guinean | Tree | Low | Low | Climax | Fruit | Moist Forest Core | Burkill (1985); African Plant Database (2024) |
| Brillantaisia | Guinean | Herb | Low | Low | Mid | Ornamental, medicinal | Moist forest understory | Burkill (1985); African Plant Database (2024) |
| Calamus deerratus | Guinean | Climber (palm) | Low | Low | Climax | Rattan, medicinal | Riparian forest | White (1983); African Plant Database (2024) |
| Campylospermum | Guinean | Shrub | Low | Low | Climax | Medicinal | Humid forest indicator | Burkill (1985); African Plant Database (2024) |
| Canarium schweinfurthii | Guinean | Tree | Low | Low | Climax | Oil, resin | Moist Forest Core | Burkill (1985); African Plant Database (2024) |
| Canavalia | Guinean | Climber/Herb | Moderate | Moderate | Pioneer | Edible, fodder | Disturbed, savanna | Kew POWO (2024); African Plant Database (2024) |
| Canavalia-type | Guinean | Climber | Moderate | High | Mid | Edible pods | Disturbed forest fringe | Burkill (1985); African Plant Database (2024) |
| Cardiospermum | Guinean | Climber | Moderate | Moderate | Mid | Medicinal | Moist savanna fringe | Burkill (1985); African Plant Database (2024) |
| Caryophyllaceae | Guinean | Herb | Moderate | High | Pioneer | Medicinal | Dry disturbed grassland | Burkill (1985); African Plant Database (2024) |
| Cassipourea | Guinean | Tree/Shrub | Moderate | Moderate | Mid | Medicinal, timber | Moist forest indicator | Hawthorne & Jongkind (2006) |
| Cf. Adina | Guinean | Tree | Low | Low | Climax | Medicinal | Moist Forest Core | Burkill (1985); African Plant Database (2024) |
| cf. Dasylepis | Guinean | Herb | Low | Low | Climax | Medicinal | Moist forest herb layer | Burkill (1985); African Plant Database (2024) |
| Chassalia-type | Guinean | Shrub | Low | Low | Climax | Medicinal | Forest understory | Burkill (1985); African Plant Database (2024) |
| Chlorophytum-type | Guinean | Herb | Moderate | High | Ruderal | Medicinal | Disturbance/open site | Burkill (1985); African Plant Database (2024) |
| Chrysophyllum | Guinean | Tree | Low | Low | Climax | Fruit, timber | Moist Forest Core | Burkill (1985); African Plant Database (2024) |
| Chytranthus macrobotrys | Guinean | Shrub | Low | Low | Climax | Medicinal | Forest understory | Burkill (1985); African Plant Database (2024) |
| Cleistanthus | Guinean | Shrub/Tree | Low | Low | Climax | Medicinal | Moist forest understory | Burkill (1985); African Plant Database (2024) |
| Cleistopholis-type patens | Guinean | Tree | Low | Low | Climax | Timber | Moist Forest Core | Burkill (1985); African Plant Database (2024) |
| Clematis | Guinean | Climber | Low | Low | Climax | Ornamental | Moist Forest Core | Hawthorne & Jongkind (2006) |
| Clusiaceae | Guinean | Tree | Low | Low | Climax | Fruit, medicinal | Moist Forest Core | Burkill (1985); African Plant Database (2024) |
| Cnestis | Guinean | Climber | Moderate | Moderate | Mid | Medicinal | Moist forest edge | Burkill (1985); African Plant Database (2024) |
| Cocculus | Guinean | Climber | Moderate | Low | Mid | Medicinal | Humid forest liana | Burkill (1985); African Plant Database (2024) |
| Cola cf. cordifolia | Guinean | Tree | Low | Low | Climax | Medicinal, stimulant | Moist Forest Core | Burkill (1985); African Plant Database (2024) |
| Commelina | Guinean | Herb | Low | High | Pioneer | Edible, medicinal | Moist disturbance indicator | Burkill (1985); African Plant Database (2024) |
| Commelinaceae | Guinean | Herb | Low | High | Pioneer | Medicinal | Moist forest margin and disturbed sites | Burkill (1985); African Plant Database (2024) |
| Connaraceae | Guinean | Climber | Low | Moderate | Mid | Medicinal | Moist Forest Core | Burkill (1985); African Plant Database (2024) |
| Convolvulaceae | Guinean | Herb | Moderate | High | Pioneer | Edible, medicinal | Disturbed forest and savanna | Burkill (1985); African Plant Database (2024) |
| Copaifera-type | Guinean | Tree | Low | Low | Climax | Oil, medicinal | Moist Forest Core | Burkill (1985); African Plant Database (2024) |
| Crudia-type | Guinean | Tree | Low | Low | Climax | Timber | Moist Forest Core | Burkill (1985); African Plant Database (2024) |
| Curculigo | Guinean | Herb | Low | Moderate | Mid | Medicinal | Moist forest understory | Burkill (1985); African Plant Database (2024) |
| Cuviera | Guinean | Shrub | Low | Low | Climax | Medicinal | Humid forest understory | Burkill (1985); African Plant Database (2024) |
| Cyathea | Guinean | Fern/Tree fern | Low | Low | Climax | None | Humid forest moisture indicator | Burkill (1985); African Plant Database (2024) |
| Cynometra-type | Guinean | Tree | Low | Low | Climax | Timber | Moist Forest Core | Burkill (1985); African Plant Database (2024) |
| Cyrtosperma | Guinean | Herb | Low | Low | Mid | Edible (tuber), ornamental | Wetland, riparian | Kew POWO (2024); African Plant Database (2024) |
| Deinbollia | Guinean | Shrub/Tree | Low | Low | Mid | Medicinal | Forest-savanna edge | Burkill (1985); African Plant Database (2024) |
| Dialium | Guinean | Tree | Low | Low | Climax | Fruit, timber | Moist Forest Core | Burkill (1985); African Plant Database (2024) |
| Dichapetalum | Guinean | Climber | Low | Low | Climax | Toxic, medicinal | Moist Forest Core | Burkill (1985); African Plant Database (2024) |
| Dioscorea | Guinean | Climber | Moderate | Moderate | Pioneer-Mid | Tuber crop, medicinal | Anthropogenic Signal | Burkill (1985); African Plant Database (2024) |
| Diospyros | Guinean | Tree | Low | Low | Climax | Timber, fruit | Moist Forest Core | Burkill (1985); African Plant Database (2024) |
| Dombeya cf. buetnerii | Guinean | Shrub | Low | Low | Climax | Medicinal | Forest understory | Burkill (1985); African Plant Database (2024) |
| Dracaena-type | Guinean | Shrub/Tree | Low | Moderate | Mid | Ornamental, medicinal | Moist forest understory | Burkill (1985); African Plant Database (2024) |
| Englerophytum | Guinean | Tree | Low | Low | Climax | Fruit, timber | Moist Forest Core | Burkill (1985); African Plant Database (2024) |
| Ericaceae | Guinean | Shrub/Herb | Low | Low | Climax | Medicinal | Montane/moist forest edge | White (1983); African Plant Database (2024) |
| Erythrococca africana | Guinean | Shrub | Moderate | Moderate | Mid | Medicinal | Moist woodland indicator | Burkill (1985); African Plant Database (2024) |
| Erythroxylum | Guinean | Shrub | Moderate | Moderate | Mid | Medicinal, stimulant | Forest understory | Burkill (1985); African Plant Database (2024) |
| Fabaceae undiff | Guinean | Herb | Moderate | Moderate | Early-Mid | Fodder, nitrogen-fixer | Open vegetation | Burkill (1985); African Plant Database (2024) |
| Flabellaria | Guinean | Climber | Moderate | Moderate | Mid | Medicinal | Forest/savanna margin | African Plant Database (2024) |
| Flabellaria-type | Guinean | Climber | Moderate | Moderate | Mid | Medicinal | Moist woodland edge | Burkill (1985); African Plant Database (2024) |
| Flabellariopsis acuminata | Guinean | Climber | Low | Low | Climax | Medicinal | Moist Forest Core | Burkill (1985); African Plant Database (2024) |
| Flueggea | Guinean | Shrub | Moderate | Moderate | Mid | Medicinal | Moist forest/woodland | Hawthorne & Jongkind (2006) |
| Gaertnera | Guinean | Shrub | Low | Low | Climax | Medicinal | Moist forest understory | Burkill (1985); African Plant Database (2024) |
| Ganophyllum-type | Guinean | Tree | Moderate | Low | Mid-Climax | Medicinal | Forest edge tree | Burkill (1985); African Plant Database (2024) |
| Garcinia | Guinean | Tree | Low | Low | Climax | Fruit, medicinal | Moist Forest Core | Burkill (1985); African Plant Database (2024) |
| Gilbertiodendron | Guinean | Tree | Low | Low | Climax | Timber | Moist Forest Core | Burkill (1985); African Plant Database (2024) |
| Gnidia-type | Guinean | Herb | Moderate | Moderate | Mid | Medicinal | Forest margin species | Burkill (1985); African Plant Database (2024) |
| Heliotropium | Guinean | Herb | Moderate | High | Pioneer | Medicinal | Moist disturbance indicator | Burkill (1985); African Plant Database (2024) |
| Hippocratea | Guinean | Climber/Shrub | Moderate | Moderate | Mid | Medicinal | Forest margin, savanna | African Plant Database (2024) |
| Hippocratea-type | Guinean | Climber | Low | Low | Climax | Medicinal | Moist Forest Core | Burkill (1985); African Plant Database (2024) |
| Holarrhena-type | Guinean | Shrub | Moderate | Moderate | Mid | Medicinal | Woodland and forest margin | Burkill (1985); African Plant Database (2024) |
| Hyperacanthus | Guinean | Shrub | Moderate | Moderate | Mid | Medicinal | Forest understory | Burkill (1985); African Plant Database (2024) |
| Icacinaceae | Guinean | Climber | Low | Low | Climax | Medicinal | Moist Forest Core | Burkill (1985); African Plant Database (2024) |
| Impatiens | Guinean | Herb | Low | Moderate | Mid | Medicinal | Moist forest understory | Burkill (1985); African Plant Database (2024) |
| Iodes | Guinean | Climber | Moderate | Low | Mid | Medicinal | Humid forest liana | Burkill (1985); African Plant Database (2024) |
| Irvingia-type | Guinean | Tree | Low | Low | Climax | Fruit, timber | Moist Forest Core | Burkill (1985); African Plant Database (2024) |
| Isonema smeathmannii | Guinean | Climber | Moderate | Moderate | Mid | Medicinal | Moist forest margin | African Plant Database (2024) |
| Ixora | Guinean | Shrub | Low | Low | Climax | Ornamental, medicinal | Moist forest understory | Burkill (1985); African Plant Database (2024) |
| Jacquemontia | Guinean | Climber | Moderate | Moderate | Mid | Ornamental | Savanna disturbance marker | Burkill (1985); African Plant Database (2024) |
| Justicia | Guinean | Herb | Moderate | Moderate | Mid | Medicinal | Forest-savanna transition | Burkill (1985); African Plant Database (2024) |
| Khaya | Guinean | Tree | Low | Low | Climax | Timber | Moist Forest Core | Burkill (1985); African Plant Database (2024) |
| Klaineanthus gaboniae | Guinean | Shrub | Low | Low | Climax | Medicinal | Forest understory | Burkill (1985); African Plant Database (2024) |
| Laccosperma secundiflorum | Guinean | Climber | Low | Low | Climax | Rattan, construction | Moist Forest Core | Hawthorne & Jongkind (2006) |
| Lamiaceae | Guinean | Herb | Moderate | Moderate | Mid | Aromatic, medicinal | Moist savanna and woodland | Burkill (1985); African Plant Database (2024) |
| Lasiodiscus | Guinean | Shrub | Low | Low | Climax | Medicinal | Forest understory | Burkill (1985); African Plant Database (2024) |
| Lecaniodiscus | Guinean | Tree | Moderate | Moderate | Mid | Timber, fruit | Moist forest | African Plant Database (2024) |
| Leea guineensis | Guinean | Shrub | Low | Low | Climax | Medicinal | Moist forest understory | Burkill (1985); African Plant Database (2024) |
| Lepisanthes senegalensis | Guinean | Tree | Moderate | Moderate | Mid | Fruit | Forest edge | Burkill (1985); African Plant Database (2024) |
| Leptactina | Guinean | Shrub | Low | Low | Climax | Medicinal | Forest understory | Burkill (1985); African Plant Database (2024) |
| Leptaulus | Guinean | Shrub | Low | Low | Climax | Medicinal | Humid forest indicator | Burkill (1985); African Plant Database (2024) |
| Lobelia | Guinean | Herb | Low | Low | Mid | Medicinal | Moist forest margin | Burkill (1985); African Plant Database (2024) |
| Loesenera-type | Guinean | Tree | Low | Low | Climax | Timber | Moist Forest Core | Burkill (1985); African Plant Database (2024) |
| Ludwigia | Guinean | Herb | Moderate | Moderate | Mid | Medicinal, ornamental | Wetlands, moist savanna | African Plant Database (2024) |
| Macaranga | Guinean | Tree | Low | Moderate | Pioneer-Mid | Medicinal | Moist Forest Core | Burkill (1985); African Plant Database (2024) |
| Machaerium lunatum | Guinean | Climber | Moderate | Low | Mid | Medicinal | Forest liana | Burkill (1985); African Plant Database (2024) |
| Macrosphyra-type | Guinean | Shrub | Low | Low | Climax | Medicinal | Forest understory | Burkill (1985); African Plant Database (2024) |
| Mallotus-type | Guinean | Tree | Low | Moderate | Mid | Medicinal | Moist Forest Core | Burkill (1985); African Plant Database (2024) |
| Manilkara-type butugii | Guinean | Tree | Low | Low | Climax | Fruit, timber | Moist Forest Core | Burkill (1985); African Plant Database (2024) |
| Mansonia-type | Guinean | Tree | Low | Low | Climax | Timber | Moist Forest Core | Burkill (1985); African Plant Database (2024) |
| Maprounea | Guinean | Shrub | Low | Low | Mid | Medicinal | Forest understory | Burkill (1985); African Plant Database (2024) |
| Mareya-type micrantha | Guinean | Shrub | Low | Low | Climax | Medicinal | Moist forest understory | Burkill (1985); African Plant Database (2024) |
| Maytenus | Guinean | Shrub | Moderate | Moderate | Mid | Medicinal | Forest edge or woodland | Burkill (1985); African Plant Database (2024) |
| Meliaceae/Sapotaceae | Guinean | Tree | Low | Low | Climax | Timber, fruit | Moist Forest Core | Burkill (1985); African Plant Database (2024) |
| Menispermaceae undiff. | Guinean | Climber | Moderate | Low | Mid | Medicinal | Forest liana | Burkill (1985); African Plant Database (2024) |
| Mezoneuron-type | Guinean | Climber | Moderate | Moderate | Mid | Timber, medicinal | Forest canopy liana | Hawthorne & Jongkind (2006) |
| Microdesmis | Guinean | Shrub | Low | Low | Climax | Medicinal | Moist forest understory | Burkill (1985); African Plant Database (2024) |
| Milicia-type excelsa | Guinean | Tree | Low | Low | Climax | Timber | Moist Forest Core | Burkill (1985); African Plant Database (2024) |
| Mimusops | Guinean | Tree | Low | Low | Climax | Fruit, timber | Moist Forest Core | Burkill (1985); African Plant Database (2024) |
| Monodora tenuifolia | Guinean | Tree | Low | Low | Climax | Medicinal | Moist Forest Core | Burkill (1985); African Plant Database (2024) |
| Moraceae undiff. | Guinean | Tree | Low | Low | Climax | Fruit | Moist Forest Core | Burkill (1985); African Plant Database (2024) |
| Morinda | Guinean | Shrub | Moderate | Moderate | Mid | Medicinal, dye | Moist forest understory | Neuwinger (2000) |
| Musanga/Myrianthus | Guinean | Tree | Low | Moderate | Pioneer | Fruit, construction | Moist Forest Core | Swaine & Hall (1983); African Plant Database (2024) |
| Mussaenda | Guinean | Shrub | Low | Moderate | Mid | Ornamental, medicinal | Forest understory | Burkill (1985); African Plant Database (2024) |
| Myrica | Guinean | Shrub | Moderate | Low | Mid | Medicinal | Moist forest indicator | White (1983); African Plant Database (2024) |
| Myrtaceae | Guinean | Tree | Low | Low | Climax | Fruit, timber | Moist Forest Core | Burkill (1985); African Plant Database (2024) |
| Napoleona-type | Guinean | Tree | Low | Low | Climax | Medicinal | Moist Forest Core | Burkill (1985); African Plant Database (2024) |
| Nesogordonia papaverifera | Guinean | Tree | Low | Low | Climax | Timber | Moist Forest Core | Hawthorne & Jongkind (2006) |
| Olea capensis subsp. hochstetteri | Guinean | Tree | Moderate | Low | Climax | Timber | Moist forest indicator | White (1983); African Plant Database (2024) |
| Ouratea | Guinean | Shrub | Low | Low | Climax | Medicinal | Forest understory | Burkill (1985); African Plant Database (2024) |
| Oxyanthus-type | Guinean | Shrub | Low | Low | Climax | Medicinal | Moist forest understory | Hawthorne & Jongkind (2006) |
| Pancovia | Guinean | Tree | Low | Low | Climax | Medicinal | Moist Forest Core | Burkill (1985); African Plant Database (2024) |
| Panda oleosa | Guinean | Tree | Low | Low | Climax | Oil-rich fruit | Moist Forest Core | Hawthorne & Jongkind (2006) |
| Parinari | Guinean | Tree | Moderate | Low | Climax | Fruit, timber | Moist forest edge | Hawthorne & Jongkind (2006) |
| Paullinia pinnata | Guinean | Climber | Low | Low | Climax | Medicinal | Moist Forest Core | Burkill (1985); African Plant Database (2024) |
| Pausinystalia-type | Guinean | Tree | Low | Low | Climax | Medicinal (stimulant) | Moist Forest Core | Burkill (1985); African Plant Database (2024) |
| Pavetta-type | Guinean | Shrub | Low | Low | Climax | Medicinal | Forest understory | Hawthorne & Jongkind (2006) |
| Pentaclethra macrophylla | Guinean | Tree | Low | Low | Climax | Oilseed, timber | Moist Forest Core | Burkill (1985); African Plant Database (2024) |
| Pentadesma grandifolia | Guinean | Tree | Low | Low | Climax | Butter, timber | Moist Forest Core | Burkill (1985); African Plant Database (2024) |
| Pentodon pentandrus | Guinean | Shrub | Moderate | Moderate | Mid | Medicinal | Forest edge indicator | Hawthorne & Jongkind (2006) |
| Piptadeniastrum africanum | Guinean | Tree | Low | Low | Climax | Timber | Moist Forest Core | Hawthorne & Jongkind (2006) |
| Piptostigma | Guinean | Shrub | Low | Low | Climax | Medicinal | Humid forest understory | Burkill (1985); African Plant Database (2024) |
| Podocarpus | Guinean | Tree | Low | Low | Climax | Timber | Moist Forest Core | Burkill (1985); African Plant Database (2024) |
| Polyscias | Guinean | Shrub | Low | Low | Climax | Ornamental, medicinal | Forest understory | Hawthorne & Jongkind (2006) |
| Pseudospondias microcarpa | Guinean | Tree | Moderate | Moderate | Mid | Fruit, medicinal | Moist forest, gallery forest | African Plant Database (2024) |
| Psychotria | Guinean | Shrub | Moderate | Moderate | Mid | Medicinal | Moist forest understorey | African Plant Database (2024); White (1983) |
| Pterocarpus santalinoides | Guinean | Tree | Moderate | Moderate | Mid | Timber, medicinal | Gallery forest | African Plant Database (2024) |
| Pycnanthus angolensis | Guinean | Tree | Moderate | Moderate | Mid | Timber, oil, medicinal | Moist forest | White (1983); African Plant Database (2024) |
| Raphia | Guinean | Palm | Moderate | Moderate | Mid | Material, fruit, wine | Wetland, swamp forest | White (1983); African Plant Database (2024) |
| Rubiaceae undiff. | Guinean | Shrub/Herb | Moderate | Moderate | Mid | Medicinal | Moist forest understorey | White (1983); African Plant Database (2024) |
| rutacaea | Guinean | Tree/shrub | Moderate | Moderate | Mid | Likely Rutaceae family | Forest margin | African Plant Database (2024) |
| Saba | Guinean | Climber | Moderate | Moderate | Mid | Fruit, medicinal | Forest-savanna margin | African Plant Database (2024) |
| Sabicea | Guinean | Climber | Low | Low | Climax | Medicinal | Moist Forest Core | Hawthorne & Jongkind (2006) |
| Salicaceae | Guinean | Tree/Shrub | Moderate | Moderate | Mid | Medicinal, timber | Moist forest/riparian | Hawthorne & Jongkind (2006) |
| Sapindaceae undiff. | Guinean | Shrub/Tree | Moderate | Moderate | Mid | Fruit, medicinal | Moist forest, woodland | African Plant Database (2024) |
| Sapium | Guinean | Tree | Moderate | Moderate | Mid | Timber, medicinal | Moist forest | African Plant Database (2024) |
| Scytopetalum | Guinean | Tree | Moderate | Moderate | Mid | Timber | Moist forest | Hawthorne & Jongkind (2006) |
| Securinega virosa | Guinean | Shrub | Moderate | Moderate | Mid | Medicinal, fencing | Woodland | African Plant Database (2024) |
| Sherbournia bignoniiflora | Guinean | Shrub | Moderate | Moderate | Mid | Medicinal | Moist forest margin | African Plant Database (2024) |
| Sorindeia | Guinean | Tree | Moderate | Moderate | Mid | Edible fruit, medicinal | Moist forest/savanna edge | Hawthorne & Jongkind (2006) |
| Spathodea | Guinean | Tree | Moderate | Moderate | Mid | Ornamental, timber, shade | Forest margin, urban | Kew POWO (2024); White (1983) |
| Sterculia | Guinean | Tree | Moderate | Moderate | Mid | Timber, medicinal | Moist savanna, woodland | African Plant Database (2024); White (1983) |
| Strombosia | Guinean | Tree | Moderate | Moderate | Mid | Timber, edible (fruit) | Moist forest | African Plant Database (2024) |
| Syzygium | Guinean | Tree | Moderate | Moderate | Mid | Fruit, medicinal | Moist forest, riverbank | African Plant Database (2024); White (1983) |
| Tabernaemontana | Guinean | Shrub | Moderate | Moderate | Mid | Medicinal, ornamental | Moist forest | African Plant Database (2024) |
| Teclea | Guinean | Shrub/Tree | Moderate | Moderate | Mid | Medicinal, aromatic | Moist forest, savanna | African Plant Database (2024) |
| Terminalia | Guinean | Tree | Moderate | Moderate | Mid | Timber, fruit, medicinal | Moist savanna, woodland | African Plant Database (2024); White (1983) |
| Tetracera alnifolia | Guinean | Climber | Moderate | Moderate | Mid | Medicinal | Moist forest, riverbanks | African Plant Database (2024) |
| Tetrapleura | Guinean | Tree | Moderate | Moderate | Mid | Medicinal, spice, timber | Moist forest, savanna edge | African Plant Database (2024); Hutchinson & Dalziel |
| Thecacoris | Guinean | Shrub | Moderate | Moderate | Mid | Medicinal | Moist forest undergrowth | Hawthorne & Jongkind (2006) |
| Thomandersiaceae | Guinean | Herb | Moderate | Moderate | Mid | Ornamental, medicinal | Moist habitats | Kew POWO (2024) |
| Thymelaeaceae | Guinean | Shrub/Herb | Moderate | Moderate | Mid | Medicinal, fiber | Woodland/undergrowth | Burkill (1985); African Plant Database (2024) |
| Tilioideae | Guinean | Tree | Moderate | Moderate | Mid | Ornamental | Moist forest | Kew POWO (2024) |
| Treculia africana | Guinean | Tree | Moderate | Moderate | Mid | Edible seeds, timber | Moist forest core | Hawthorne & Jongkind (2006) |
| Trema guineensis | Guinean | Tree | Moderate | Moderate | Mid | Timber, medicinal | Moist forest margin | African Plant Database (2024) |
| Triaspis | Guinean | Liana | Moderate | Moderate | Mid | Medicinal | Forest margin | African Plant Database (2024) |
| Trichilia | Guinean | Tree | Moderate | Moderate | Mid | Timber, medicinal | Moist forest | African Plant Database (2024); White (1983) |
| Trilepisium | Guinean | Tree | Moderate | Moderate | Mid | Timber, edible fruit | Moist forest core | Hawthorne & Jongkind (2006) |
| Triplochiton scleroxylon | Guinean | Tree | Moderate | Moderate | Mid | Timber | Moist forest | White (1983); African Plant Database (2024) |
| Uapaca | Guinean | Tree | Moderate | Moderate | Mid | Fruit, timber | Moist forest | African Plant Database (2024); White (1983) |
| Uncaria | Guinean | Climber | Moderate | Moderate | Mid | Medicinal | Moist forest margin | African Plant Database (2024) |
| Urginea-type | Guinean | Herb | Moderate | Moderate | Mid | Medicinal | Savanna bulbs | Burkill (1985); African Plant Database (2024) |
| Vepris | Guinean | Tree/Shrub | Moderate | Moderate | Mid | Medicinal | Moist forest, woodland | Hawthorne & Jongkind (2006) |
| Verbenaceae | Guinean | Herb/Shrub | Moderate | Moderate | Mid | Medicinal, ornamental | Moist savanna, forest edge | African Plant Database (2024) |
| Vitaceae undiff. | Guinean | Climber | Moderate | Moderate | Mid | Medicinal | Forest-savanna transition | Hawthorne & Jongkind (2006) |
| Zacateza pedicellata | Guinean | Herb | Moderate | Moderate | Mid | Medicinal | Savanna | Kew POWO (2024) |
| Zanthoxylum | Guinean | Tree/Shrub | Moderate | Moderate | Mid | Spice, medicinal | Forest margin, savanna | African Plant Database (2024) |
| Acrostichum aureum | Guinean+Riparian | Fern | Low | Low | Climax | None | Moist Forest Core | Burkill (1985); African Plant Database (2024) |
| Ammannia-type | Guinean+Riparian | Herb | Low | High | Pioneer | Medicinal | Riparian Indicator | Burkill (1985); African Plant Database (2024) |
| Anthocerotaceae undiff. | Guinean+Riparian | Bryophyte | Low | Low | Pioneer | None | Riparian Indicator | Burkill (1985); African Plant Database (2024) |
| Araceae | Guinean+Riparian | Climber/Herb | Low | Moderate | Mid | Ornamental, medicinal | Riparian Indicator | Hutchinson & Dalziel, 1954 |
| Avicennia | Guinean+Riparian | Tree | Low | Low | Climax | Mangrove products | Moist Forest Core | Tomlinson (1986); African Plant Database (2024) |
| Bridelia | Guinean+Riparian | Shrub/Tree | Moderate | Moderate | Mid | Medicinal | Riparian Indicator | Burkill (1985); African Plant Database (2024) |
| Burnatia | Guinean+Riparian | Herb | Low | High | Pioneer | None | Riparian Indicator | Burkill (1985); African Plant Database (2024) |
| Calamus deerratus | Guinean+Riparian | Climber | Low | Low | Climax | Rattan, construction | Moist Forest Core | Hawthorne & Jongkind (2006) |
| Carapa procera | Guinean+Riparian | Tree | Low | Low | Climax | Oil, timber | Moist Forest Core | Hawthorne & Jongkind (2006) |
| Cassipourea-type | Guinean+Riparian | Tree | Low | Low | Climax | Medicinal | Moist Forest Core | Hawthorne & Jongkind (2006) |
| Celtis | Guinean+Riparian | Tree | Moderate | Low | Climax | Timber, fodder | Riparian Indicator | Burkill (1985); African Plant Database (2024) |
| Ceratopteris | Guinean+Riparian | Fern | Low | Low | Pioneer | Medicinal | Moist Forest Core | Burkill (1985); African Plant Database (2024) |
| Citrus | Guinean (cultivated) | Tree | Low | Moderate | Mid | Fruit | Moist Forest Core | Burkill (1985); African Plant Database (2024) |
| Cocos nucifera | Guinean+Riparian | Tree | Low | Moderate | Mid | Food, oil | Moist Forest Core | Burkill (1985); African Plant Database (2024) |
| Combretaceae/Melastomaceae | Guinean+Riparian | Shrub/Tree | Moderate | Moderate | Mid | Medicinal | Riparian Indicator | Burkill (1985); African Plant Database (2024) |
| Crinum-type natans | Guinean+Riparian | Herb | Low | Low | Climax | Ornamental | Riparian Indicator | Hutchinson & Dalziel, 1954 |
| Crotalaria | Guinean+Riparian | Shrub | Moderate | High | Pioneer | Fodder, medicinal | Riparian Indicator | Burkill (1985); African Plant Database (2024) |
| Cyclosorus | Guinean+Riparian | Fern | Low | Low | Climax | None | Moist Forest Core | Burkill (1985); African Plant Database (2024) |
| Cyrtosperma-type | Guinean+Riparian | Herb | Low | Moderate | Mid | Edible (tuber), ornamental | Riparian Indicator | Burkill (1985); African Plant Database (2024) |
| Elaeis guineensis | Guinean+Riparian | Tree | Low | Moderate | Mid-Climax | Oil, cultural | Moist Forest Core | Orwa et al. (2009) |
| Ficus | Guinean+Riparian | Tree | Low | Moderate | Climax | Fruit, cultural | Moist Forest Core | Burkill (1985); African Plant Database (2024) |
| Gardenia imperialis | Guinean+Riparian | Tree | Low | Low | Climax | Medicinal | Moist Forest Core | Burkill (1985); African Plant Database (2024) |
| Holoptelea grandis | Guinean/Sudanian+Riparian | Tree | Moderate | Low | Climax | Medicinal | Riparian Indicator | Orwa et al. (2009) |
| Homalium | Guinean+Riparian | Tree | Low | Low | Climax | Timber | Moist Forest Core | Hawthorne & Jongkind (2006) |
| Ilex mitis | Guinean+Riparian | Tree | Low | Low | Climax | Medicinal | Moist Forest Core | White (1983); African Plant Database (2024) |
| Isonema smeathmannii-type | Guinean+Riparian | Climber | Low | Moderate | Mid | Medicinal | Moist Forest Core | Burkill (1985); African Plant Database (2024) |
| Laguncularia racemosa | Guinean+Riparian | Tree | Low | Low | Climax | Mangrove species | Moist Forest Core | Tomlinson (1986); African Plant Database (2024) |
| Laurembergia | Guinean+Riparian | Shrub | Low | Low | Climax | Medicinal | Riparian Indicator | Burkill (1985); African Plant Database (2024) |
| Lecaniodiscus-type | Guinean+Riparian | Tree | Low | Low | Climax | Timber | Moist Forest Core | Hawthorne & Jongkind (2006) |
| Ludwigia-type | Guinean+Riparian | Herb | Low | High | Pioneer | Medicinal | Riparian Indicator | Burkill (1985); African Plant Database (2024) |
| Lygodium | Guinean+Riparian | Climber | Low | Low | Climax | None | Riparian Indicator | Burkill (1985); African Plant Database (2024) |
| Mitragyna-type stipulosa | Guinean+Riparian | Tree | Low | Low | Climax | Medicinal | Moist Forest Core | Burkill (1985); African Plant Database (2024) |
| Nauclea-type | Guinean+Riparian | Tree | Low | Low | Climax | Timber | Moist Forest Core | Burkill (1985); African Plant Database (2024) |
| Naucleeae | Guinean+Riparian | Tree | Low | Low | Climax | Timber | Moist Forest Core | Burkill (1985); African Plant Database (2024) |
| Pandanus | Guinean+Riparian | Tree | Low | Low | Climax | Fiber, ornamental | Moist Forest Core | Burkill (1985); African Plant Database (2024) |
| Passifloraceae undiff. | Guinean+Riparian | Climber | Moderate | Moderate | Mid | Medicinal, edible | Riparian Indicator | Burkill (1985); African Plant Database (2024) |
| Phoenix reclinata | Guinean+Riparian | Palm | High | Moderate | Mid | Palm wine, thatch | Riparian Indicator | Orwa et al. (2009) |
| Protea | Guinean (Montane) | Shrub | High | Moderate | Early-Mid | Ornamental | Montane/open woodland | White (1983); African Plant Database (2024) |
| Rhizophora | Guinean+Riparian | Tree | Low | Low | Climax | Mangrove products | Moist Forest Core | Tomlinson (1986); African Plant Database (2024) |
| Salix | Guinean+Riparian | Tree | Low | Moderate | Mid | Medicinal | Moist Forest Core | White (1983); African Plant Database (2024) |
| Spondias-type mombin | Guinean+Riparian | Tree | Moderate | Moderate | Mid | Fruit | Riparian Indicator | Orwa et al. (2009) |
| Symphonia globulifera | Guinean+Riparian | Tree | Low | Low | Climax | Medicinal, oil | Moist Forest Core | Hawthorne & Jongkind (2006) |
| Crinum | Riparian | Herb | Moderate | Moderate | Mid | Ornamental, medicinal | Wetland, riparian | African Plant Database (2024) |
| Ammannia | Riparian | Herb | Low | Moderate | Pioneer | Medicinal, aquatic | Wetland/riverine | Kew POWO (2024); African Plant Database (2024) |
| Araceae | Riparian | Herbaceous climber | Moderate | Moderate | Mid | Ornamental, edible (some) | Wetland, forest margin | White (1983); African Plant Database (2024) |
| Acacia | Sahelian | Tree/Shrub | Moderate | Moderate | Mid | Fuelwood/Timber/Medicinal | Dry Phase | Burkill (1985); African Plant Database (2024) |
| Acridocarpus | Sahelian | Liana | Moderate | Moderate | Mid | Medicinal, ornamental | Woodland edge | Burkill (1985); African Plant Database (2024) |
| Adenium | Sahelian | Shrub | High | High | Pioneer | Ornamental, medicinal | Arid zone | Burkill (1985); African Plant Database (2024) |
| Aizoaceae undiff. | Sahelian | Herb/Shrub | High | High | Pioneer | Ornamental, edible (some) | Dryland, ruderal | Kew POWO (2024) |
| Aloe | Sahelian | Succulent herb | High | High | Pioneer | Medicinal, ornamental | Arid indicator | Kew POWO (2024) |
| Argania spinosa | Sahelian | Tree | High | Moderate | Climax | Oil, fodder, medicinal | Arid indicator | Kew POWO (2024); White (1983) |
| Bauhinia rufescens | Sahelian | Tree/Shrub | High | High | Pioneer | Medicinal, fodder | Dry woodland/savanna | Burkill (1985); African Plant Database (2024) |
| Blepharis | Sahelian | Herb | Moderate | High | Pioneer | Medicinal | Dry phase indicator | Burkill (1985); African Plant Database (2024) |
| Boraginaceae | Sahelian | Herb | High | High | Pioneer | Medicinal | Dry Phase Indicator | Burkill (1985); African Plant Database (2024) |
| Boscia | Sahelian | Shrub/Tree | High | High | Pioneer | Fruit, medicinal | Arid savanna | African Plant Database (2024); Le HouÃ©rou (2006) |
| Buxus | Sahelian | Shrub/Small tree | Moderate | Moderate | Climax | Ornamental, medicinal | Forest margin, savanna | Kew POWO (2024); White (1983) |
| Catunaregam | Sahelian | Shrub | Moderate | Moderate | Mid | Medicinal | Savanna, woodland | African Plant Database (2024) |
| Caylusea | Sahelian | Herb | Moderate | Moderate | Pioneer | Medicinal, fodder | Dry/disturbed, ruderal | Kew POWO (2024) |
| Celosia-type trigyna | Sahelian | Herb | High | High | Pioneer | Edible, fodder | Dry Phase Indicator | Burkill (1985); African Plant Database (2024) |
| Centaurea perrottetii | Sahelian | Herb | Moderate | Moderate | Mid | Medicinal | Savanna grassland | Burkill (1985); African Plant Database (2024) |
| Chrozophora | Sahelian | Herb/Shrub | High | Moderate | Pioneer | Dye, medicinal | Dry sandy soils | African Plant Database (2024) |
| Commiphora | Sahelian | Shrub/Tree | High | High | Mid | Resin, medicinal | Dry woodland, arid zone | Burkill (1985); African Plant Database (2024) |
| Corchorus | Sahelian | Herb | Moderate | Moderate | Pioneer | Fiber (jute), edible | Ruderal, farm weed | Kew POWO (2024); African Plant Database (2024) |
| Crossopteryx febrifuga | Sahelian | Tree/Shrub | Moderate | Moderate | Mid | Medicinal (febrifuge) | Savanna, woodland | Kew POWO (2024); White (1983) |
| Cucumis | Sahelian | Herb | High | Moderate | Mid | Fruit | Dry Phase Indicator | Burkill (1985); African Plant Database (2024) |
| Daniellia | Sahelian | Tree | Moderate | Moderate | Mid | Timber, medicinal | Savanna, woodland | White (1983); African Plant Database (2024) |
| Euploca strigosa | Sahelian | Herb | High | High | Pioneer | Medicinal | Dry Phase Indicator | Burkill (1985); African Plant Database (2024) |
| Fagonia | Sahelian | Herb | Very High | High | Pioneer | Medicinal | Desert/arid indicator | Burkill (1985); African Plant Database (2024) |
| Farsetia | Sahelian | Shrub | Moderate | High | Pioneer | Medicinal, fodder | Arid, sandy soils | Kew POWO (2024) |
| Galium-type | Sahelian | Herb | Moderate | Moderate | Mid | Medicinal | Cool/moist forest fringe | Burkill (1985); African Plant Database (2024) |
| Gomphrena | Saharo-Sahelian | Herb | High | High | Pioneer | Ornamental, medicinal | Dry Phase Indicator | Burkill (1985); African Plant Database (2024) |
| Gymnosporia senegalensis | Sahelian | Shrub/Tree | High | Moderate | Mid | Medicinal | Arid savanna | Kew POWO (2024) |
| Haematostaphis | Sahelian | Shrub/Tree | High | High | Pioneer | Fruit, medicinal | Dry savanna | African Plant Database (2024) |
| Harungana madagascariensis | Sahelian | Shrub/Tree | Moderate | Moderate | Mid | Medicinal, dye | Savanna/forest margin | Kew POWO (2024); White (1983) |
| Hypoestes-type | Sahelian | Herb | Moderate | Moderate | Mid | Medicinal | Savanna woodland understory | Burkill (1985); African Plant Database (2024) |
| Lepidagathis | Sahelian | Herb | Moderate | Moderate | Mid | Medicinal | Savanna woodland herb | Burkill (1985); African Plant Database (2024) |
| Leucas-type | Sahelian | Herb | Moderate | High | Pioneer | Medicinal | Disturbed dry open sites | Burkill (1985); African Plant Database (2024) |
| Palisota | Sahelian | Herb | Moderate | Moderate | Mid | Medicinal | Moist forest understory | Burkill (1985); African Plant Database (2024) |
| Pancratium-type | Sahelian | Herb | Moderate | Moderate | Mid | Ornamental, medicinal | Savanna woodland bulbs | Burkill (1985); African Plant Database (2024) |
| Polycarpaea | Sahelian | Herb | Moderate | Moderate | Mid | Medicinal | Dry grassland | Burkill (1985); African Plant Database (2024) |
| Polycarpon | Sahelian | Herb | Moderate | Moderate | Mid | Medicinal, edible weed | Disturbed fields | Burkill (1985); African Plant Database (2024) |
| Polydora serratuloides | Sahelian | Herb | Moderate | Moderate | Mid | Medicinal | Grassland | Burkill (1985); African Plant Database (2024) |
| Priva | Sahelian | Herb | Moderate | Moderate | Pioneer | Medicinal | Disturbed, ruderal | Kew POWO (2024) |
| Rauvolfia | Sahelian | Shrub/Small tree | Moderate | Moderate | Mid | Medicinal (alkaloids) | Savanna woodland | African Plant Database (2024) |
| Rhamnaceae | Sahelian | Shrub/Tree | Moderate | Moderate | Mid | Medicinal, edible (fruits) | Dry savanna | Kew POWO (2024) |
| Salvadoraceae | Sahelian | Shrub/Tree | High | High | Mid | Medicinal | Arid indicator | Burkill (1985); African Plant Database (2024) |
| Santiria | Sahelian | Tree | Moderate | Moderate | Mid | Timber, medicinal | Moist forest | African Plant Database (2024) |
| Schrebera arborea | Sahelian | Tree | Moderate | Moderate | Mid | Timber | Woodland, savanna | African Plant Database (2024); White (1983) |
| Senna | Sahelian | Shrub | Moderate | Moderate | Mid | Medicinal, fodder | Savanna woodland | Burkill (1985); African Plant Database (2024) |
| Sericocomopsis | Sahelian | Herb | Moderate | Moderate | Mid | Medicinal | Dry savanna/steppe | Kew POWO (2024) |
| Ziziphus | Sahelian | Shrub/Tree | High | High | Pioneer | Edible fruit, medicinal | Arid savanna indicator | Burkill (1985); African Plant Database (2024) |
| Zygophyllaceae | Sahelian | Herb/Shrub | Moderate | Moderate | Mid | Grazing/Medicinal | Dry Phase | Burkill (1985); African Plant Database (2024) |
| Zygophyllum | Sahelian | Herb/Shrub | Moderate | Moderate | Mid | Fodder/Medicinal | Dry Phase | Burkill (1985); African Plant Database (2024) |
| Achyranthes-type | Sahelo-Sudanian | Herb | High | High | Pioneer | Medicinal | Dry Phase Indicator | Burkill (1985); African Plant Database (2024) |
| Aerva lanata-type | Sahelo-Sudanian | Herb | High | High | Ruderal | Medicinal, forage | Dry Phase Indicator | Burkill (1985); African Plant Database (2024) |
| Aerva-type lanata | Sahelo-Sudanian | Herb | High | High | Ruderal | Medicinal | Dry Phase Indicator | Burkill (1985); African Plant Database (2024) |
| Anthospermum | Sahelo-Sudanian | Shrub | High | Low | Early | Medicinal, timber | Dry Phase Indicator | Burkill (1985); African Plant Database (2024) |
| Ascolepis | Sahelo-Sudanian | Herb | High | High | Pioneer | Medicinal | Dry Phase Indicator | Burkill (1985); African Plant Database (2024) |
| Asparagus | Sahelo-Sudanian | Herb | High | Moderate | Mid | Edible shoots, medicinal | Dry Phase Indicator | Burkill (1985); African Plant Database (2024) |
| Asteraceae | Sahelo-Sudanian | Herb | High | High | Pioneer | Medicinal | Dry Phase Indicator | Burkill (1985); African Plant Database (2024) |
| Basilicum-type | Sahelo-Sudanian | Herb | High | Moderate | Ruderal | Cotton, bark fiber | Dry Phase Indicator | Burkill (1985); African Plant Database (2024) |
| Burkea africana | Sahelo-Sudanian | Tree | High | Moderate | Mid | Resin | Dry Phase Indicator | FAO (1986) |
| Burseraceae undiff. | Sahelo-Sudanian | Tree | High | Moderate | Mid | Shea butter, food | Dry Phase Indicator | PROTA (2004) |
| Calycobolus-type | Sahelo-Sudanian | Climber | High | High | Pioneer | Medicinal | Dry Phase Indicator | Burkill (1985); African Plant Database (2024) |
| Capparis | Sahelo-Sudanian | Shrub | High | Low | Early | Timber, kapok fiber | Dry Phase Indicator | PROTA (2004) |
| Cayratia-type | Sahelo-Sudanian | Climber | High | High | Pioneer | Edible leaves | Dry Phase Indicator | Burkill (1985); African Plant Database (2024) |
| Chaetachme aristata | Sahelo-Sudanian | Shrub | High | MISSING | Early | MISSING | Dry Phase Indicator | PROTA (2004) |
| Chenopodium-type | Sahelo-Sudanian | Herb | High | High | Pioneer | Edible, medicinal | Dry Phase Indicator | Burkill (1985); African Plant Database (2024) |
| Cichorieae undiff. | Sahelo-Sudanian | Herb | High | High | Pioneer | Medicinal | Dry Phase Indicator | Burkill (1985); African Plant Database (2024) |
| Cichorioideae | Sahelo-Sudanian | Herb | Moderate | High | Ruderal | Medicinal | Disturbed/anthropogenic indicator | PROTA (2004) |
| Cissampelos cf. mucronate | Sahelo-Sudanian | Climber | Moderate | Moderate | Mid | Medicinal | Savanna woodland indicator | Burkill (1985); African Plant Database (2024) |
| Cissus | Sahelo-Sudanian | Climber | High | High | Pioneer | Edible, medicinal | Dry Phase Indicator | Burkill (1985); African Plant Database (2024) |
| Clutia | Sahelo-Sudanian | Shrub | High | Moderate | Early | Medicinal | Dry Phase Indicator | Burkill (1985); African Plant Database (2024) |
| Commicarpus-type | Sahelo-Sudanian | Herb | High | High | Pioneer | Medicinal | Dry Phase Indicator | Burkill (1985); African Plant Database (2024) |
| Corchorus-type | Sahelo-Sudanian | Herb | High | High | Pioneer | Fiber, food | Dry Phase Indicator | Burkill (1985); African Plant Database (2024) |
| Cyathula-type | Sahelo-Sudanian | Herb | High | High | Ruderal | Medicinal | Dry Phase Indicator | Burkill (1985); African Plant Database (2024) |
| Cyperus | Sahelo-Sudanian | Sedge | Moderate | High | Pioneer | Fodder, basketry | Wetland, disturbed sites | Kew POWO (2024) |
| Dichrostachys | Sahelo-Sudanian | Shrub | High | High | Early | Fodder, medicinal | Dry Phase Indicator | Burkill (1985); African Plant Database (2024) |
| Dodonaea | Sahelo-Sudanian | Shrub | High | High | Early | Medicinal | Dry Phase Indicator | Burkill (1985); African Plant Database (2024) |
| Drymaria cordata-type | Sahelo-Sudanian | Herb | Moderate | High | Pioneer | Medicinal | Disturbed shady areas | Burkill (1985); African Plant Database (2024) |
| Entada-type | Sahelo-Sudanian | Climber | High | Moderate | Mid | Medicinal, forage | Dry Phase Indicator | Burkill (1985); African Plant Database (2024) |
| Ephedra fragilis-type | Sahelo-Sudanian+Riparian | Shrub | High | High | Pioneer | Medicinal | Dry Phase Indicator | Burkill (1985); African Plant Database (2024) |
| Euphorbiaceae | Sahelo-Sudanian | Herb | High | High | Pioneer | Medicinal, toxic | Dry Phase Indicator | Burkill (1985); African Plant Database (2024) |
| Faboideae | Sahelo-Sudanian | Shrub | High | High | Pioneer | Fodder, medicinal | Dry Phase Indicator | Burkill (1985); African Plant Database (2024) |
| Faidherbia | Sahelo-Sudanian | Tree | High | High | Pioneer-Mid | Fodder, agroforestry | Dry Phase Indicator | Burkill (1985); African Plant Database (2024) |
| Hyphaene-type | Sahelian+Riparian | Tree | High | Moderate | Pioneer | Palm wine, thatch | Dry Phase Indicator | Burkill (1985); African Plant Database (2024) |
| Hyptis-type | Sahelo-Sudanian | Herb | Moderate | High | Pioneer | Aromatic, medicinal | Disturbed grassland/savanna | Burkill (1985); African Plant Database (2024) |
| Indigofera | Sahelo-Sudanian | Shrub | High | High | Pioneer | Dye, medicinal | Dry Phase Indicator | Burkill (1985); African Plant Database (2024) |
| Ipomoea-type | Sahelo-Sudanian | Climber | High | High | Pioneer | Edible, medicinal | Dry Phase Indicator | Burkill (1985); African Plant Database (2024) |
| Jatropha | Sahelo-Sudanian | Shrub | High | High | Pioneer | Oil, medicinal | Dry Phase Indicator | Burkill (1985); African Plant Database (2024) |
| Kedrostis-type | Sahelo-Sudanian | Climber | High | High | Pioneer | Medicinal | Dry Phase Indicator | Burkill (1985); African Plant Database (2024) |
| Luffa-type cylindrica | Sahelo-Sudanian | Climber | High | High | Pioneer | Edible/loofah sponge | Dry Phase Indicator | Burkill (1985); African Plant Database (2024) |
| Melochia | Sahelo-Sudanian | Shrub | Moderate | High | Ruderal | Fiber, medicinal | Anthropogenic Signal | Burkill (1985); African Plant Database (2024) |
| Merremia-type | Sahelo-Sudanian | Climber | High | High | Pioneer | Medicinal | Dry Phase Indicator | Burkill (1985); African Plant Database (2024) |
| Micrococca-type mercurialis | Sahelian+Riparian | Shrub | Moderate | Moderate | Mid | Medicinal | Riparian Indicator | Burkill (1985); African Plant Database (2024) |
| Mimosoid Clade | Sahelo-Sudanian | Tree/Shrub | High | High | Early-Mid | Fodder, shade | Dry Phase Indicator | Burkill (1985); African Plant Database (2024) |
| Mitracarpus hirtus | Sahelo-Sudanian | Herb | Moderate | High | Pioneer | Medicinal | Disturbed savanna fields | Burkill (1985); African Plant Database (2024) |
| Momordica-type | Sahelo-Sudanian | Climber | High | High | Pioneer | Edible fruit, medicinal | Dry Phase Indicator | Burkill (1985); African Plant Database (2024) |
| Nyctaginaceae | Sahelo-Sudanian | Herb | High | High | Ruderal | Medicinal | Dry Phase Indicator | Burkill (1985); African Plant Database (2024) |
| Oldenlandia-type | Sahelo-Sudanian | Herb | Moderate | High | Pioneer | Medicinal | Disturbed savanna and fallows | Burkill (1985); African Plant Database (2024) |
| Prosopis | Sahelo-Sudanian | Tree | Very High | High | Pioneer | Fuel, fodder, agroforestry | Arid zone invader | Burkill (1985); African Plant Database (2024) |
| Rhynchosia-type | Sahelo-Sudanian | Climber | Moderate | High | Ruderal | Fodder | Disturbed dry areas | Burkill (1985); African Plant Database (2024) |
| Suaeda monoica-type | Sahelian+Riparian | Shrub | High | High | Early | None | Dry Phase Indicator | Burkill (1985); African Plant Database (2024) |
| Urticaceae | Sahelo-Sudanian | Herb | Moderate | Moderate | Mid | Medicinal | Moist forest and riparian | Burkill (1985); African Plant Database (2024) |
| Achyranthes | Sudanian | Herb | Moderate | Moderate | Mid | Medicinal/Anti-inflammatory | Disturbed Farmland | Burkill (1985); African Plant Database (2024) |
| Adansonia | Sudanian | Tree | High | Low | Climax | Food, water storage | Stable Sudanian woodland | PROTA (2004) |
| Aerva | Sudanian | Herb | High | High | Ruderal | Medicinal | Dry Phase Indicator | Burkill (1985); African Plant Database (2024) |
| Albizia-type | Sudanian | Tree | Moderate | Low | Mid | Fruit, oil | Semi-deciduous woodland | Burkill (1985); African Plant Database (2024) |
| Amaranthaceae undiff | Sudanian | Herb | High | High | Pioneer | Food, fodder | Dry disturbance indicator | Burkill (1985); African Plant Database (2024) |
| Ambrosia artemisiifolia | Sudanian | Herb | High | High | Pioneer | Allergenic, invasive | Dry ruderal, anthropogenic signal | Chauvel et al. (1989) |
| Anacardiaceae | Sudanian | Tree | Moderate | Moderate | Mid-Climax | Medicinal | Woodland core | PROTA (2004) |
| Apiaceae | Sudanian | Herb | Moderate | Moderate | Mid | Medicinal | Dry woodland herb layer | Burkill (1985); African Plant Database (2024) |
| Asteroideae | Sudanian | Herb | High | High | Pioneer | Medicinal | Open savanna and ruderal | Burkill (1985); African Plant Database (2024) |
| Asystasia gangetica | Sudanian | Herb | Moderate | High | Pioneer | Medicinal, ornamental | Ruderal, disturbed | Kew POWO (2024); African Plant Database (2024) |
| Aubrevillea | Sudanian | Tree | Moderate | Moderate | Climax | Medicinal | Sudanian climax indicator | Burkill (1985); African Plant Database (2024) |
| Basilicum | Sudanian | Herb | Moderate | High | Ruderal | Medicinal, aromatic | Dry Phase Indicator | Burkill (1985); African Plant Database (2024) |
| Boswellia | Sudanian | Tree | High | Moderate | Mid | Timber, dye | Dry woodland/rocky outcrops | PROTA (2004) |
| Butyrospermum | Sudanian | Tree | Moderate | Low | Climax | Timber, ecological significance | Parkland climax species | Orwa et al. (2009) |
| Caesalpinioideae undiff. | Sudanian | Tree | Moderate | Moderate | Mid-Climax | Medicinal, edible fruit | Woodland stability | Burkill (1985); African Plant Database (2024) |
| Campanulaceae | Sudanian | Herb | Moderate | Moderate | Mid | Medicinal | Moist savanna | Burkill (1985); African Plant Database (2024) |
| Cassine | Sudanian | Tree/Shrub | Moderate | Moderate | Mid | Medicinal, ornamental | Woodland/edge | Hawthorne & Jongkind (2006) |
| Cayratia | Sudanian | Climber | Moderate | Moderate | Mid | Edible, medicinal | Forest margin, savanna | African Plant Database (2024) |
| Celastraceae | Sudanian | Shrub | Moderate | Moderate | Mid | MISSING | Woodland understory | PROTA (2004) |
| Celosia | Sudanian | Herb | Moderate | High | Pioneer | Leafy vegetable | Ruderal, disturbed | Kew POWO (2024); African Plant Database (2024) |
| Celosia trigyna | Sudanian | Herb | High | High | Pioneer | Edible leaves | Disturbed dryland field margins | Burkill (1985); African Plant Database (2024) |
| cf. Scrophulariaceae | Sudanian | Herb | Moderate | Moderate | Mid | Medicinal | Savanna to forest transition | Burkill (1985); African Plant Database (2024) |
| Chenopodium | Sudanian | Herb | Moderate | High | Pioneer | Edible, medicinal | Disturbed/fallow land | Kew POWO (2024) |
| Clappertonia ficifolia | Sudanian | Shrub | Moderate | High | Early | Fiber, medicinal | Open woodland signal | Burkill (1985); African Plant Database (2024) |
| Clerodendrum | Sudanian | Shrub | Moderate | Moderate | Mid | Medicinal | Woodland and edge indicator | Burkill (1985); African Plant Database (2024) |
| Cochlospermum | Sudanian | Tree | High | Moderate | Early-Mid | Dye, medicinal | Fire-prone woodland | PROTA (2004) |
| Combretum molle-type | Sudanian | Tree | High | High | Mid | Timber, medicinal | Fire-adapted woodland | PROTA (2004) |
| Commicarpus | Sudanian | Herb/Shrub | Moderate | Moderate | Mid | Medicinal | Savanna, disturbed soils | Kew POWO (2024) |
| Crossopterix | Sudanian | Tree | Moderate | Moderate | Mid | Medicinal | Dry savanna woodland | White (1983); African Plant Database (2024) |
| Cucurbitaceae | Sudanian | Climber | Moderate | High | Ruderal | Food, medicinal | Anthropogenic Signal | PROTA (2004) |
| Cussonia | Sudanian | Tree | Moderate | Low | Climax | Medicinal | Woodland indicator | Burkill (1985); African Plant Database (2024) |
| Cyperaceae | Sudanian | Herb | Low-Moderate | High | Early-Mid | Thatching, matting | Moist soil indicator | Burkill (1985); African Plant Database (2024) |
| Dalbergia | Sudanian | Tree | Moderate | Low | Mid-Climax | Timber, dye | Woodland/climax species | Burkill (1985); African Plant Database (2024) |
| Daniellia pynaertii-type | Sudanian | Tree | Moderate | Moderate | Climax | Resin, timber | Woodland stability | Burkill (1985); African Plant Database (2024) |
| Detarium | Sudanian | Tree | Low | Low | Climax | Fruit, timber | Moist savanna climax | Burkill (1985); African Plant Database (2024) |
| Dolichos | Sudanian | Climber | Moderate | High | Ruderal | Food, medicinal | Agricultural/disturbed | Burkill (1985); African Plant Database (2024) |
| Drymaria cordata | Sudanian | Herb | Moderate | High | Pioneer | Medicinal | Disturbed soils, shaded sites | Kew POWO (2024) |
| Entada | Sudanian | Climber | Moderate | Moderate | Pioneer | Medicinal, water purification | Savanna, forest margin | Kew POWO (2024); African Plant Database (2024) |
| Ephedra fragilis | Sudanian | Shrub | High | High | Pioneer | Medicinal | Arid indicator | White (1983); African Plant Database (2024) |
| Erythrina | Sudanian | Tree | Moderate | Moderate | Mid | Ornamental, medicinal | Moist savanna edge | Burkill (1985); African Plant Database (2024) |
| Erythrophleum | Sudanian | Tree | Moderate | Moderate | Mid | Timber, medicinal | Woodland indicator | Hawthorne & Jongkind (2006) |
| Euploca strigose | Sudanian | Herb | Moderate | Moderate | Pioneer | Medicinal | Disturbed, sandy soil | Kew POWO (2024) |
| Fadogia-type | Sudanian | Shrub | Moderate | Moderate | Mid | Medicinal | Dry savanna woodland | Burkill (1985); African Plant Database (2024) |
| Galium | Sudanian | Herb | Moderate | Moderate | Mid | Medicinal | Moist woodland, grassland | Kew POWO (2024) |
| Gnidia | Sudanian | Shrub | Moderate | Moderate | Mid | Medicinal | Savanna, woodland | African Plant Database (2024) |
| Hildegardia barteri | Sudanian | Tree | Moderate | Moderate | Mid | Timber, medicinal | Savanna woodland species | Burkill (1985); African Plant Database (2024) |
| Hyphaene | Sudanian | Palm | High | High | Mid | Fruit, material, medicinal | Dry floodplain | White (1983); African Plant Database (2024) |
| Hypoestes | Sudanian | Herb | Moderate | Moderate | Mid | Medicinal | Moist/dry woodland | Kew POWO (2024) |
| Hyptis | Sudanian | Herb | Moderate | Moderate | Pioneer | Aromatic, medicinal | Ruderal, disturbed | Kew POWO (2024) |
| Illigera | Sudanian | Climber | Moderate | Moderate | Mid | Medicinal | Dry to moist savanna climber | Burkill (1985); African Plant Database (2024) |
| Ipomoea | Sudanian | Climber/Herb | Moderate | Moderate | Pioneer | Tuber, fodder, ornamental | Disturbed woodland | African Plant Database (2024) |
| Isoberlinia | Sudanian | Tree | Moderate | Moderate | Mid | Timber, fodder | Woodland, Sudanian | Hawthorne & Jongkind (2006) |
| Jasminum | Sudanian | Climber/Shrub | Moderate | Moderate | Mid | Ornamental | Woodland/forest margin | Kew POWO (2024) |
| Kedrostis | Sudanian | Climber/Herb | Moderate | Moderate | Pioneer | Medicinal | Disturbed, savanna | Kew POWO (2024) |
| Landolphia | Sudanian | Climber | Moderate | Moderate | Mid | Fruit, medicinal | Forest-savanna margin | Kew POWO (2024); African Plant Database (2024) |
| Leucas | Sudanian | Herb | Moderate | Moderate | Pioneer | Medicinal, aromatic | Dry savanna | Kew POWO (2024) |
| Liliaceae | Sudanian | Herb | Moderate | Moderate | Mid | Medicinal | Savanna understory | Burkill (1985); African Plant Database (2024) |
| Lippia | Sudanian | Shrub | Moderate | High | Early | Aromatic, medicinal | Disturbed woodland/bushland | Burkill (1985); African Plant Database (2024) |
| Lythraceae | Sudanian | Shrub | Moderate | Low | Mid | Medicinal | Moist savanna edge | Burkill (1985); African Plant Database (2024) |
| Merremia | Sudanian | Climber | Moderate | High | Pioneer | Medicinal | Savanna disturbance | Burkill (1985); African Plant Database (2024) |
| Mezoneuron | Sudanian | Climber | Moderate | Moderate | Mid | Ornamental | Savanna woodland | African Plant Database (2024) |
| Micrococca | Sudanian | Shrub | Moderate | Moderate | Mid | Medicinal | Moist savanna, woodland | African Plant Database (2024) |
| Mimosa pigra | Sudanian | Shrub | Moderate | High | Pioneer | Forage, invasive | Disturbed riparian zone | Lowe et al. (2000) |
| Momordica | Sudanian | Climber/Herb | Moderate | Moderate | Pioneer | Vegetable, medicinal | Ruderal, disturbed | African Plant Database (2024) |
| Ocimum | Sudanian | Herb | Moderate | High | Pioneer | Aromatic, medicinal | Ruderal | Kew POWO (2024) |
| Ocimum-type | Sudanian | Herb | Moderate | High | Ruderal | Aromatic, medicinal | Agricultural disturbance | Burkill (1985); African Plant Database (2024) |
| Oldenlandia | Sudanian | Herb | Moderate | Moderate | Pioneer | Medicinal | Disturbed sites, savanna | Kew POWO (2024) |
| Pancratium | Sudanian | Herb | Moderate | Moderate | Mid | Medicinal, ornamental | Moist/wet soils | Kew POWO (2024) |
| Paradoxum | Sudanian | Herb | Moderate | Moderate | Mid | Medicinal | Poorly resolved | Burkill (1985); African Plant Database (2024) |
| Phaseolus | Sudanian | Herb | Moderate | High | Pioneer | Edible, forage | Disturbed soils, ruderal | Kew POWO (2024) |
| Piliostigma | Sudanian | Tree | Moderate | Moderate | Mid | Fodder, timber | Savanna woodland | Burkill (1985); African Plant Database (2024) |
| Poaceae | Sudanian | Herb | Moderate | High | Early | Fodder, agriculture | Open/ Savanna zone grass | White (1983); African Plant Database (2024) |
| Psilotrichum | Sudanian | Herb | Moderate | Moderate | Mid | Medicinal | Savanna, woodland | Kew POWO (2024) |
| Psydrax-type schimperiana | Sudanian | Shrub | Moderate | Low | Mid | Medicinal | Savanna edge signal | Burkill (1985); African Plant Database (2024) |
| Pteridophyta | Sudanian | Fern | Moderate | Moderate | Mid | Ornamental | Moist forest, savanna | Kew POWO (2024) |
| Pteris | Sudanian | Fern | Moderate | Moderate | Mid | Ornamental | Moist habitats | Kew POWO (2024) |
| Solanum | Sudanian | Herb/Shrub | Moderate | High | Pioneer | Edible (some), medicinal | Disturbed sites, savanna | Kew POWO (2024) |
| Spermacoce | Sudanian | Herb | Moderate | High | Pioneer | Medicinal | Disturbed savanna | Burkill (1985); African Plant Database (2024) |
| Spondianthus | Sudanian | Tree | Moderate | Moderate | Mid | Timber, medicinal | Moist savanna | African Plant Database (2024); White (1983) |
| Stachytarpheta | Sudanian | Herb | Moderate | High | Pioneer | Medicinal, ornamental | Disturbed savanna/fields | Burkill (1985); African Plant Database (2024) |
| Stereospermum | Sudanian | Tree | Moderate | Moderate | Mid | Timber, medicinal | Moist savanna, woodland | African Plant Database (2024) |
| Strophanthus | Sudanian | Climber | Moderate | Moderate | Mid | Poison/medicinal | Forest/savanna edge | Burkill (1985); African Plant Database (2024) |
| Strychnos | Sudanian | Climber/Shrub | Moderate | Moderate | Mid | Medicinal, toxic | Forest/savanna margin | Hawthorne & Jongkind (2006) |
| Tacazzea apiculata | Sudanian | Climber | Moderate | Moderate | Mid | Medicinal | Woodland, forest margin | African Plant Database (2024) |
| Tapinanthus | Sudanian | Liana | Moderate | Moderate | Mid | Medicinal | Woodland parasite | Burkill (1985); African Plant Database (2024) |
| Tephrosia | Sudanian | Herb/Shrub | Moderate | High | Pioneer | Fodder, medicinal | Savanna, disturbed soils | African Plant Database (2024) |
| Trifolium | Sudanian | Herb | Moderate | High | Pioneer | Fodder | Disturbed grasslands | Kew POWO (2024) |
| Triumfetta | Sudanian | Herb | High | High | Pioneer | Fiber, medicinal | Disturbed dry areas | Burkill (1985); African Plant Database (2024) |
| Triumfetta-type | Sudanian | Herb | High | High | Pioneer | Fiber | Disturbed dry areas | Burkill (1985); African Plant Database (2024) |
| Vahlia | Sudanian | Herb | Moderate | Moderate | Pioneer | Medicinal | Dry woodland | Kew POWO (2024) |
| Vernonia | Sudanian | Herb/Shrub | Moderate | Moderate | Mid | Medicinal, fodder | Savanna/grassland indicator | African Plant Database (2024); White (1983) |
| Vernonieae undiff. | Sudanian | Herb/Shrub | Moderate | Moderate | Mid | Medicinal | Savanna, grassland | African Plant Database (2024) |
| Vigna | Sudanian | Herb | Moderate | High | Pioneer | Edible, fodder | Savanna, disturbed soils | Kew POWO (2024) |
| Zornia | Sudanian | Herb | Moderate | Moderate | Mid | Fodder, medicinal | Savanna, grassland | African Plant Database (2024) |
| Aeschynomene | Sudanian+Riparian | Shrub | Moderate | Moderate | Early | Timber, shade | Riparian Indicator | FAO (1986) |
| Anthostema senegalense | Sudanian+Riparian | Tree | Low | Low | Climax | Medicinal | Riparian Indicator | Burkill (1985); African Plant Database (2024) |
| Casuarina equisetifolia | Sudanian+Riparian | Tree | High | High | Pioneer | Timber, coastal stabilization | Riparian Indicator | Orwa et al. (2009) |
| Gardenieae | Sudanian+Riparian | Shrub | Moderate | Moderate | Mid | Medicinal | Riparian Indicator | Burkill (1985); African Plant Database (2024) |
| Keetia cornelia | Sudanian+Riparian | Climber | Moderate | Moderate | Mid | Medicinal | Riparian Indicator | Burkill (1985); African Plant Database (2024) |
| Micrococca mercurialis | Sudanian+Riparian | Shrub | Moderate | Moderate | Mid | Medicinal | Riparian Indicator | Burkill (1985); African Plant Database (2024) |
| Persicaria senegalensis | Sudanian+Riparian | Herb | Moderate | High | Pioneer | Medicinal | Riparian Indicator | Burkill (1985); African Plant Database (2024) |
| Polygonum | Sudanian+Riparian | Herb | Moderate | High | Pioneer | Medicinal | Riparian Indicator | Burkill (1985); African Plant Database (2024) |
| Sesbania | Sudanian+Riparian | Shrub | Moderate | High | Pioneer | Fodder, green manure | Riparian Indicator | Burkill (1985); African Plant Database (2024) |
| Adenia | Sudano-Guinean | Climber | Moderate | Moderate | Mid | Medicinal | Forest edge or woodland | Burkill (1985); African Plant Database (2024) |
| Afraegle | Sudano-Guinean | Tree | Moderate | Low | Climax | Fruit, medicinal | Moist savanna woodland | Burkill (1985); African Plant Database (2024) |
| Afzelia cf. africana | Sudano-Guinean | Tree | Moderate | Low | Climax | Timber | Woodland climax species | Burkill (1985); African Plant Database (2024) |
| Ampelidaceae undiff | Sudano-Guinean | Climber | Moderate | Moderate | Mid | Medicinal | Moist woodland/savanna edge | Burkill (1985); African Plant Database (2024) |
| Antiaris | Sudano-Guinean | Tree | Low | Moderate | Climax | Timber | Moist Forest Core | Kew (2023) |
| Baissea | Sudano-Guinean | Climber | Low | High | Mid | Medicinal, aromatic | Moist Forest Core | Kew (2023) |
| Balanites wilsoniana | Sudano-Guinean | Tree | Moderate | Low | Climax | Fruit, oil | Forest savanna transition | Burkill (1985); African Plant Database (2024) |
| Baphia-type | Sudano-Guinean | Shrub | Moderate | Moderate | Mid | Dye, medicinal | Moist woodland | Burkill (1985); African Plant Database (2024) |
| Blighia | Sudano-Guinean | Tree | Moderate | Moderate | Mid | Fruit (ackee), medicinal | Moist forest-savanna woodland | Burkill (1985); African Plant Database (2024) |
| Bombax | Sudano-Guinean | Tree | Moderate | Moderate | Climax | Resin, ritual | Humid woodland signal | Burkill (1985); African Plant Database (2024) |
| Borassus/Hyphaene | Sudano-Guinean | Tree | High | Moderate | Pioneer | Palm wine, construction | Savanna edge palms | PROTA (2004) |
| Brachystegia | Sudano-Guinean | Tree | Moderate | Low | Climax | Timber | Miombo-like savanna woodland | Burkill (1985); African Plant Database (2024) |
| Brassicaceae | Sudano-Guinean | Herb | Moderate | High | Pioneer | Edible, medicinal | Disturbed moist sites | Burkill (1985); African Plant Database (2024) |
| Calycobolus | Sudano-Guinean | Climber | Moderate | Moderate | Mid | Medicinal | Moist forest margin | African Plant Database (2024) |
| Campanulaceae-type | Sudano-Guinean | Herb | Moderate | Moderate | Mid | Medicinal | Moist savanna herb | Burkill (1985); African Plant Database (2024) |
| Canthium | Sudano-Guinean | Shrub | Moderate | Moderate | Mid | Medicinal | Savanna to moist forest edge | Burkill (1985); African Plant Database (2024) |
| Cassia | Sudano-Guinean | Shrub/Tree | Moderate | High | Early-Mid | Medicinal | Disturbance/open woodland | White (1983); African Plant Database (2024) |
| Catha-type | Sudano-Guinean | Shrub | Moderate | Moderate | Mid | Stimulant, medicinal | Savanna edge | Burkill (1985); African Plant Database (2024) |
| Ceiba pentandra | Sudano-Guinean | Tree | Low | Low | Climax | Medicinal | Moist Forest Core | Kew (2023) |
| Centrosema | Sudano-Guinean | Climber | Moderate | Moderate | Mid | Forage, nitrogen-fixer | Open savanna edge | Burkill (1985); African Plant Database (2024) |
| Clausena anisata | Sudano-Guinean | Shrub | Low | Moderate | Mid | Medicinal | Moist forest edge | Burkill (1985); African Plant Database (2024) |
| Cleome | Sudano-Guinean | Herb | High | High | Ruderal | Food, medicinal | Anthropogenic Signal | Burkill (1985); African Plant Database (2024) |
| Cordia | Sudano-Guinean | Tree | Moderate | Moderate | Mid | Timber, medicinal | Forest-savanna transition | Burkill (1985); African Plant Database (2024) |
| Croton-type | Sudano-Guinean | Shrub | Moderate | High | Early | Medicinal | Disturbed woodland | Burkill (1985); African Plant Database (2024) |
| Crudia | Sudano-Guinean | Tree | Low | Low | Climax | Timber | Moist Forest Core | Sosef et al. (2017) |
| Desmodium adscendens-type | Sudano-Guinean | Herb | Moderate | High | Pioneer | Medicinal, fodder | Disturbed forest edge | Burkill (1985); African Plant Database (2024) |
| Dicliptera | Sudano-Guinean | Herb | Moderate | Moderate | Mid | Medicinal | Savanna and forest margin | Burkill (1985); African Plant Database (2024) |
| Drypetes | Sudano-Guinean | Tree | Low | Low | Climax | Medicinal | Moist Forest Core | Sosef et al. (2017) |
| Eugenia | Sudano-Guinean | Tree | Low | Low | Climax | Fruit, medicinal | Moist Forest Core | Burkill (1985); African Plant Database (2024) |
| Globimetula-type | Sudano-Guinean | Climber | Moderate | Moderate | Mid | Medicinal, parasitic | Savanna/forest edge hemiparasite | Burkill (1985); African Plant Database (2024) |
| Glyphaea brevis | Sudano-Guinean | Shrub | Moderate | High | Early | Medicinal | Disturbance/open sites | Burkill (1985); African Plant Database (2024) |
| Grewia-type | Sudano-Guinean | Shrub | High | High | Early | Edible fruit, fiber | Dry to moist savanna edge | Burkill (1985); African Plant Database (2024) |
| Grewioideae | Sudano-Guinean | Shrub | Moderate | High | Early | Medicinal | Forest edge/disturbed | Burkill (1985); African Plant Database (2024) |
| Hannoa | Sudano-Guinean | Tree | Low | Low | Climax | Medicinal | Moist Forest Core | Burkill (1985); African Plant Database (2024) |
| Hibiscus | Sudano-Guinean | Shrub | Moderate | High | Pioneer | Edible calyx, ornamental | Anthropogenic Signal | Burkill (1985); African Plant Database (2024) |
| Hymenocardia | Sudano-Guinean | Tree | Moderate | Moderate | Mid | Medicinal | Forest-savanna transition | Burkill (1985); African Plant Database (2024) |
| Jasminum-type | Sudano-Guinean | Climber | Moderate | Moderate | Mid | Ornamental, medicinal | Forest edge/woodland | Burkill (1985); African Plant Database (2024) |
| Kohautia | Sudano-Guinean | Herb | Moderate | High | Ruderal | Medicinal | Anthropogenic Signal | Burkill (1985); African Plant Database (2024) |
| Landolphia-type | Sudano-Guinean | Climber | Moderate | Moderate | Mid | Edible fruit, medicinal | Savanna and forest transition | Burkill (1985); African Plant Database (2024) |
| Lannea | Sudano-Guinean | Tree | Moderate | Moderate | Mid | Fruit, medicinal | Woodland/forest edge | Burkill (1985); African Plant Database (2024) |
| Leonotis-type | Sudano-Guinean | Herb | Moderate | High | Ruderal | Medicinal | Disturbed forest edge | Burkill (1985); African Plant Database (2024) |
| Lonchocarpus-type | Sudano-Guinean | Tree | Moderate | Moderate | Mid | Insecticide, medicinal | Forest-savanna edge | Burkill (1985); African Plant Database (2024) |
| Lophira | Sudano-Guinean | Tree | Moderate | Moderate | Climax | Timber, oil | Savanna woodland | Burkill (1985); African Plant Database (2024) |
| Margaritaria discoidea | Sudano-Guinean | Tree | Moderate | Moderate | Mid | Medicinal | Forest-savanna transition | Burkill (1985); African Plant Database (2024) |
| Millettia-type | Sudano-Guinean | Tree | Moderate | Moderate | Mid | Dye, medicinal | Moist woodland | Burkill (1985); African Plant Database (2024) |
| Monotes kerstingii-type | Sudano-Guinean | Tree | Moderate | Low | Mid-Climax | Timber | Dry forest-savanna transition | Burkill (1985); African Plant Database (2024) |
| Morelia senegalensis | Sudano-Guinean | Shrub | Moderate | Moderate | Mid | Medicinal | Forest-savanna edge | Arbonnier (2004) |
| Nelsonia | Sudano-Guinean | Herb | Moderate | Moderate | Mid | Medicinal | Savanna woodland edge | Burkill (1985); African Plant Database (2024) |
| Newbouldia laevis | Sudano-Guinean | Shrub/Tree | Moderate | High | Mid | Medicinal, ritual | Cultural forest edge species | Arbonnier (2004) |
| Ormocarpum-type | Sudano-Guinean | Shrub | High | High | Early | Forage, medicinal | Disturbance savanna edge | Burkill (1985); African Plant Database (2024) |
| Parkia | Sudano-Guinean | Tree | Moderate | Moderate | Mid | Food (seeds), fodder | Savanna-forest transitional | Burkill (1985); African Plant Database (2024) |
| Phaseolus-type | Sudano-Guinean | Climber | Moderate | High | Mid | Food (bean) | Agroforest signal | Burkill (1985); African Plant Database (2024) |
| Phyllanthus | Sudano-Guinean | Shrub | Moderate | High | Ruderal | Medicinal | Disturbance indicator | Burkill (1985); African Plant Database (2024) |
| Polypodium | Sudano-Guinean | Herb | Low | Low | Climax | Medicinal | Moist understory | Sosef et al. (2017) |
| Premna | Sudano-Guinean | Shrub | Moderate | Moderate | Mid | Medicinal | Woodland to forest edge | Burkill (1985); African Plant Database (2024) |
| Quassia silvestris | Sudano-Guinean | Shrub | Low | Low | Climax | Medicinal | Forest fringe species | Burkill (1985); African Plant Database (2024) |
| Secamone | Sudano-Guinean | Climber | Moderate | Moderate | Mid | Medicinal | Forest margin, savanna | African Plant Database (2024) |
| Secamone-type | Sudano-Guinean | Climber | Moderate | Moderate | Mid | Medicinal | Savanna woodland/edge | Burkill (1985); African Plant Database (2024) |
| Stipularia | Sudano-Guinean | Shrub | Moderate | Moderate | Mid | Medicinal | Forest understorey | African Plant Database (2024) |
| Rutaceae undiff. | Unresolved | Unknown | Moderate | Moderate | Mid | Many genera: edible/med. | Unresolved | African Plant Database (2024) |
